# Supplementary material for: Contextual effects in sensorimotor adaptation adhere to associative learning rules
Source: eLife. 2022 Oct 5;11:e75801. doi: 10.7554/eLife.75801 (PMC9635873; doi:10.7554/eLife.75801)
Supplement: Figure 2—source data 1. [file elife-75801-fig2-data1.xlsx]

## Sheet: Figure 2B
Experiment 1: Differential- time course
		Acquisition
		0	5.74537	3.04082	8.3105	11.3864	9.36716	9.4259	14.946	9.66946	14.1009	12.8322	13.7234	18.4811	14.5743	15.6536	15.8254	21.796	13.0758	13.1612	20.6762	20.1029	33.532	23.6334	23.3914	29.5676	25.3026	29.5504	NaN	17.547	21.7222	9.98661	16.6199	18.5175	14.9798	9.32177	10.3362	10.2135	10.8991	4.58433	3.97989	3.72704	3.59316	1.62572	2.25104	1.43924	-3.22855	1.52206	4.82163
		0	3.77585	4.27044	9.88119	2.78002	9.48838	1.68858	16.7653	13.8656	4.79989	9.16775	24.628	15.7809	18.5592	15.3338	13.0903	12.3923	23.1959	18.8929	15.8014	13.1225	19.2754	18.9016	22.8106	19.8316	22.5307	26.7357	26.2501	26.2761	17.1612	18.3891	20.1605	25.0383	23.7868	19.4655	23.5156	22.1483	24.3748	29.9126	17.5243	28.5648	22.149	33.1918	28.695	21.0951	28.2789	25.485	25.8834
		0	-8.61841	-1.51306	-9.18366	2.32314	10.7535	17.3896	8.96497	11.724	20.6339	21.3094	23.3385	19.2292	20.867	25.5946	22.6887	25.8615	20.8723	15.688	16.6656	25.8074	26.5595	22.5997	23.7141	22.2972	29.398	28.6773	28.5581	28.6647	31.6614	30.3246	25.0653	29.5875	27.7072	32.2756	31.0892	26.7622	21.8643	30.1544	29.1399	29.1214	31.0082	38.6023	28.9944	24.6201	28.983	24.7714	23.155
		0	6.68891	11.5161	11.0783	13.6394	15.1566	13.2428	18.1883	22.4972	24.171	25.7156	23.3534	26.4242	16.2176	22.0704	25.9354	20.7318	20.4855	24.59	24.6987	23.1429	28.3709	25.672	27.1948	23.3389	23.1348	17.2348	21.1233	18.8764	19.7337	22.1111	24.6407	27.4415	31.846	29.5826	28.498	34.1412	32.0491	35.1857	33.313	28.7686	32.3884	28.0749	25.2191	27.7491	32.5247	28.928	29.6852
		0	14.2859	17.8238	17.2111	20.7466	27.2458	24.6389	32.0582	22.4258	28.1872	26.8771	27.0987	26.4523	30.7161	35.308	30.4713	33.1599	24.8824	30.8254	33.5662	23.2119	16.6957	20.937	16.0504	22.9975	11.0778	8.07603	9.25752	8.49087	11.0627	4.39951	5.64615	6.48754	6.45201	1.88971	3.41427	7.72788	2.47485	13.4559	5.99317	6.13098	6.42607	8.40239	6.23657	7.34911	7.17138	11.7281	14.521
		0	6.26665	5.07577	2.29319	5.866	2.61182	10.7912	15.4172	11.3096	16.2842	19.7893	23.8162	19.9042	18.5755	18.1666	21.6165	29.6725	30.7688	28.5751	28.4277	29.9255	29.5053	29.8295	28.4082	32.5607	29.7756	31.1192	30.1497	27.5983	28.9966	35.376	31.6933	37.3396	34.9325	30.8497	30.8415	32.634	40.8135	35.2926	33.7922	35.3636	33.045	32.7772	31.8329	32.4816	30.8807	24.3839	29.1579
		0	3.50852	-5.6034	0.897068	7.79855	4.60443	1.58965	1.50397	3.26561	3.15514	5.56309	11.5451	11.343	16.4444	15.1117	18.222	23.2208	20.4056	24.5292	24.5827	30.0579	28.402	28.2749	30.1005	28.2835	25.9904	25.8298	19.328	29.0393	39.8489	37.7781	22.6531	24.3972	22.3634	28.712	32.0492	31.2083	21.3598	21.0967	19.9244	19.795	14.8762	18.3822	19.8422	14.0403	18.9122	14.7944	20.2966
		0	2.77445	-2.835	9.69417	10.1727	8.32376	11.6726	14.2308	14.3946	21.8581	15.1816	22.6238	18.7728	25.2363	25.8956	26.4063	33.776	26.0489	27.1592	27.6894	28.674	26.9271	25.4845	23.0926	19.0801	27.1658	26.8494	25.9861	18.5712	29.0106	26.1706	28.9343	29.671	23.1107	25.8336	31.2237	23.6534	23.9648	24.0701	24.6764	23.7729	16.1602	19.9324	19.3743	16.8402	26.4868	29.6352	29.562
		0	0.661322	5.06999	-0.603972	1.35988	8.02478	2.0088	4.051	1.15988	9.51342	3.02632	2.87628	7.23205	9.12928	5.23863	10.4981	8.64733	10.9753	16.8565	12.5508	6.33068	7.15935	13.3793	18.4459	12.7841	10.3934	14.0699	14.4927	20.7214	11.5724	10.0273	15.1603	4.57999	6.02925	4.94448	12.2348	22.7392	15.0728	11.6746	18.241	10.7392	16.4327	18.9799	22.1571	18.8052	20.0345	7.02983	13.2675
		0	11.4708	12.1431	6.41112	4.02128	12.8499	11.8171	17.4058	25.018	20.2026	24.6262	32.4581	25.2782	30.6184	27.8843	33.364	30.7719	32.0865	32.7719	34.2169	36.9831	36.2029	31.7679	26.3202	26.734	27.8034	31.9148	28.1397	37.0911	39.6452	40.5435	39.9277	40.6762	37.2818	36.3969	37.8142	29.725	31.585	36.2269	34.6526	35.9739	34.2798	39.1693	28.156	33.9063	32.2399	31.37	39.4033
		0	16.9132	15.0797	13.2394	15.0549	22.6629	18.9304	22.7235	21.3575	27.6143	29.8091	37.7905	32.2089	28.5124	30.7963	22.7754	26.0804	30.5591	34.8345	36.2625	35.4363	24.4228	25.4052	25.0736	25.9066	24.5169	21.8025	24.2593	27.9617	20.7031	19.0405	26.0427	26.1883	22.2669	22.0048	19.2025	25.609	21.1941	22.0264	17.747	16.6445	24.9574	20.9275	25.2586	19.0606	24.2107	17.2345	21.6926
		0	5.57955	16.8232	9.73463	15.8944	16.8564	17.3539	15.8504	18.6203	13.7564	26.6184	26.6583	26.4598	24.229	29.0206	27.2404	23.5792	26.4089	32.5904	23.1548	33.209	28.4372	27.3804	32.0941	26.4626	26.5463	25.6229	22.9799	32.117	35.2502	24.3779	28.9718	28.604	27.5833	32.6925	24.9295	33.8232	26.0547	39.5577	27.9949	33.3789	34.9722	27.5111	31.175	33.362	39.7397	33.9108	33.7351
		0	-10.5697	7.46867	4.90582	21.0787	12.4402	22.3396	20.4477	20.7739	17.0439	25.7769	23.3238	24.8165	15.9962	12.3512	25.6518	28.8394	21.8894	22.1856	28.2231	24.2413	21.4088	27.9985	18.6062	26.3274	26.7897	25.0799	27.0084	28.7782	31.0112	24.3578	30.3706	28.8824	25.2956	24.7412	31.2673	29.1602	23.4449	37.2328	21.123	30.6652	33.5401	35.6035	29.4933	31.8752	36.46	42.1101	36.5906
		0	-8.36663	-1.58733	9.46859	15.8469	15.5182	13.431	20.4705	16.7536	15.3838	19.1489	16.8251	14.9951	19.587	20.5032	17.2073	17.2974	21.0109	19.9048	14.2673	16.7965	19.8351	23.2038	25.5465	16.8694	13.9891	13.0045	18.123	24.3288	17.8279	20.5199	22.4606	26.5371	27.0565	30.3345	14.9864	27.9384	29.3131	26.2068	23.9742	22.9041	27.7558	56.3842	35.5548	34.4391	30.6148	53.7799	26.265
		0	3.04448	8.43031	7.24319	13.0686	14.4883	11.1932	14.3403	17.9984	15.5235	11.0448	14.7483	17.6714	16.85	24.6064	23.2422	23.7222	27.0181	24.9311	24.6515	29.9287	29.7839	31.8804	29.6069	23.7189	27.1263	28.9103	27.0795	33.7744	33.5819	26.4519	30.7788	23.5988	28.7008	29.4307	31.2454	27.0294	22.7079	26.9205	28.2418	29.5714	34.2036	36.2863	34.0919	26.726	34.6014	35.4081	32.696
		0	0.608784	-1.537	-0.219432	6.43786	6.47714	14.1665	9.12216	11.2829	41.8344	20.8863	45.2259	21.1939	20.7585	20.8452	25.5311	22.8294	21.5803	12.8828	16.58	19.9317	15.5211	19.6222	13.322	17.1332	23.1365	9.44708	16.4032	20.7355	28.5048	22.727	18.5826	19.0571	14.6345	15.839	18.7397	2.39352	8.98056	15.3716	15.4409	7.51102	16.8213	19.2101	-3.25416	-0.672922	21.9477	20.3238	16.3975
Mean		0	3.36057	5.85413	6.27257	10.4672	12.3043	12.605	15.4054	15.1323	18.3789	18.5858	23.1271	20.3902	20.4295	21.5238	22.4854	23.8986	23.204	23.7737	23.8759	24.8064	24.5024	24.7482	23.9861	23.3683	23.4173	22.7453	22.6092	25.0358	26.0809	23.2863	24.2318	24.7877	23.3767	23.3947	23.8367	24.1817	22.2596	25.5606	22.2349	22.6645	23.9131	27.1913	22.8174	21.4448	25.6161	25.151	24.8206
Standard deviation		0	7.70074	7.3587	6.42004	6.3766	6.4038	6.82264	7.31028	6.86945	9.46372	8.22471	10.2124	6.39995	6.04711	7.72067	6.19201	6.93637	5.81897	7.08819	7.35736	8.25184	7.43056	4.9679	5.24454	5.21943	6.15097	7.84495	6.00862	7.20583	9.18049	9.94972	8.04605	9.37126	9.00905	10.4059	9.7019	9.47437	9.48954	10.3066	9.10851	10.734	10.391	13.3035	11.5376	11.4058	11.0304	13.2242	9.32502
SEM		0	1.92518	1.83967	1.60501	1.59415	1.60095	1.70566	1.82757	1.71736	2.36593	2.05618	2.55309	1.59999	1.51178	1.93017	1.548	1.73409	1.45474	1.77205	1.83934	2.06296	1.85764	1.24197	1.31113	1.30486	1.53774	1.96124	1.55142	1.80146	2.29512	2.48743	2.01151	2.34281	2.25226	2.60149	2.42547	2.36859	2.37239	2.57666	2.27713	2.68349	2.59775	3.32588	2.8844	2.85145	2.7576	3.30604	2.33126
[truncated: 752 more columns]
