# Supplementary material for: Contextual effects in sensorimotor adaptation adhere to associative learning rules
Source: eLife. 2022 Oct 5;11:e75801. doi: 10.7554/eLife.75801 (PMC9635873; doi:10.7554/eLife.75801)
Supplement: Figure 2—source data 2. [file elife-75801-fig2-data2.xlsx]

## Sheet: Figure 2C
Experiment 1: Differential- Acquisition
	Trial n-1	CS+		CS-			Pavlovian effect
	Trial n	CS+	CS-	CS+	CS-		CS+ - CS-
		-0.671666	-0.0488607	0.118783	0.309419		-0.406721
		2.16507	0.329129	0.189594	-2.90313		2.46433
		1.48558	-0.558798	0.44818	-1.18835		1.84045
		0.0492551	1.30675	-1.29469	-0.370799		-1.09069
		-0.00225805	-0.345239	0.376961	-0.704507		0.712224
		1.06574	2.75236	-2.84706	-1.07458		-1.72955
		0.997849	-0.937373	1.7392	-1.30001		2.48722
		1.1328	-1.94512	2.17492	-1.4825		3.36768
		1.99331	0.491638	-1.27585	-1.62253		0.924173
		1.04504	-0.207862	1.35242	-2.08503		2.34518
		0.703735	1.5727	-0.749172	-1.38681		-0.115663
		1.34272	0.79241	-1.69233	-1.95322		0.405596
		1.11103	-0.261786	-0.374411	-1.35807		1.17824
		-0.00728762	-0.202065	0.669764	-0.44288		0.65371
		2.25693	2.36496	-2.03087	-2.78248		0.321784
		1.02408	1.24106	-1.38562	-0.989827		-0.306386
Mean		0.980746	0.396493	-0.286262	-1.33346		0.815723
Standard deviation		0.821114	1.22749	1.41737	0.842356		1.40807
SEM		0.205279	0.306872	0.354344	0.210589		0.352016
