# Supplementary material for: Contextual effects in sensorimotor adaptation adhere to associative learning rules
Source: eLife. 2022 Oct 5;11:e75801. doi: 10.7554/eLife.75801 (PMC9635873; doi:10.7554/eLife.75801)
Supplement: Figure 2—source data 3. [file elife-75801-fig2-data3.xlsx]

## Sheet: Figure 2D
Experiment 1: Differential- Probe
	Trial n-1	CS+		CS-			Pavlovian effect
	Trial n	CS+	CS-	CS+	CS-		CS+ - CS-
		-0.117969	-0.415158	-0.0182032	0.415479		-0.0682464
		0.548929	-0.861322	1.1578	-0.87597		1.72201
		0.625911	-2.55752	1.48555	0.594649		2.03717
		-0.488617	0.513319	0.397946	-0.330011		-0.13699
		0.194626	-0.7761	1.20739	-0.747843		1.46298
		0.25556	-1.35237	0.953406	0.738012		0.911664
		-0.176343	-2.55366	3.17402	-0.581138		3.06624
		-0.116792	-2.47487	2.89436	-0.395552		2.82399
		0.228215	0.338794	0.399592	-1.18546		0.737235
		0.326396	-1.03967	1.90231	-0.845008		2.05669
		-0.0052269	-0.297821	0.310448	-0.122889		0.362966
		0.143407	-0.45155	0.449357	-0.424045		0.73418
		0.238641	-0.384738	-0.235835	-0.607174		0.497359
		0.0866581	2.0437	-0.584528	-2.19823		-0.171672
		0.407194	0.779301	-1.46126	-0.827269		-0.503047
		0.213704	-1.21939	1.27014	-0.262771		1.483
Mean		0.147768	-0.669316	0.831406	-0.478451		1.06347
Standard deviation		0.282778	1.25261	1.20242	0.712108		1.08212
SEM		0.0706946	0.313153	0.300606	0.178027		0.270531
