# Supplementary material for: Contextual effects in sensorimotor adaptation adhere to associative learning rules
Source: eLife. 2022 Oct 5;11:e75801. doi: 10.7554/eLife.75801 (PMC9635873; doi:10.7554/eLife.75801)
Supplement: Figure 5—source data 1. [file elife-75801-fig5-data1.xlsx]

## Sheet: Figure 5B
Experiment 1: Dynamics of adaptation and Pavlovian effects
		Adaptation effect
		2.00744	0.391216	0.0324966	-1.07932	-1.17418	0.156876	-0.419607	-1.34608	-0.313398	2.28885	-1.8901	0.553108
		6.15396	6.76943	4.7681	-0.0926395	4.63936	0.655094	4.36244	1.26118	5.7017	3.83548	1.62327	1.99243
		5.61898	0.116431	1.81072	3.75194	1.43914	-0.674209	-1.22287	-1.28831	-0.0388324	0.19106	0.336811	-1.59546
		1.46925	2.23785	1.90718	-0.116259	1.05692	2.37764	2.48144	3.97965	1.25567	1.58312	1.10255	1.27519
		3.95823	-0.00189296	4.32083	1.85521	2.88659	-1.95475	2.86477	-0.043388	-2.04808	-3.60392	5.3444	1.34582
		4.2609	3.06132	4.43853	6.37805	6.35471	3.30712	2.02122	4.81872	1.64067	0.953351	0.672708	5.64689
		3.60295	3.33617	-0.096668	-0.569955	2.57904	-0.164803	-1.69723	-3.51538	-0.796558	0.974775	1.67078	-2.50827
		2.76831	5.72822	-0.128793	-2.72664	-0.825828	-1.9764	-3.60917	-1.05235	1.21749	0.363234	-2.0842	-1.61133
		2.79164	-2.32068	3.21279	-1.21081	-0.652247	3.19801	2.03776	7.44174	3.65708	7.27655	4.75026	-3.321
		6.02175	5.03993	4.44272	1.57066	3.04382	2.88776	2.82344	3.14716	3.19986	-0.421712	2.66968	0.361436
		6.21678	-1.95392	0.945306	2.50369	1.66053	6.67679	5.2911	0.912321	1.01572	2.31321	4.67978	2.69316
		2.48533	6.10937	2.30342	0.702219	3.91197	4.17734	9.3208	4.94747	4.14976	-1.83161	3.61402	0.780628
		1.96627	-1.02612	2.93567	-0.198603	5.81673	0.362682	0.0552799	-3.39076	6.51138	1.43268	1.45121	0.0296992
		7.40924	-1.66028	1.12109	2.21223	2.30777	-0.130475	-2.43776	-2.01831	-1.60595	0.0656316	-4.51068	1.81605
		-1.538	7.02573	2.09749	3.2073	4.00094	3.7062	5.51846	11.7119	4.16355	3.29926	3.59019	4.1929
		2.92775	4.40003	3.95013	5.14267	1.83208	0.512487	0.179891	3.94492	2.57752	1.9097	1.85443	1.57362
Mean		3.63255	2.3283	2.37881	1.33311	2.42983	1.44483	1.72312	1.84441	1.89297	1.28935	1.55469	0.826554
Standard deviation		2.27382	3.28672	1.70577	2.46403	2.22034	2.40271	3.3762	4.17974	2.53873	2.43986	2.68884	2.34493
SEM		0.568455	0.821679	0.426444	0.616008	0.555085	0.600678	0.844051	1.04494	0.634681	0.609964	0.672211	0.586232
		Pavlovian effect
		2.62784	-2.83498	-2.21361	0.0754456	1.39911	-0.483336	0.237673	-1.73164	-0.991811	0.202231	0.404045	-0.391891
		-0.648283	4.22463	3.79677	5.13955	0.75321	3.4113	2.46103	2.36424	4.32441	7.11195	5.05964	2.65463
		0.0165298	-0.432236	1.90778	4.062	4.0061	0.937617	3.67813	0.144267	1.88485	2.30995	1.07452	3.52767
		-0.602708	0.104637	-0.757256	-1.62021	-0.331579	0.00555765	-1.67878	-1.06012	1.84195	-0.50923	-0.807842	-1.71248
		-0.49181	-0.490018	0.77438	2.07444	2.96612	1.27264	1.31329	0.649985	2.7669	1.52205	5.33669	-0.819918
		0.746441	1.06049	-3.84208	-3.78877	-2.10182	-3.64162	-3.69515	-2.22213	-4.74363	-0.444666	-1.95195	1.36721
		3.01602	1.36353	-1.75636	2.6448	1.75817	3.22565	5.00766	1.7105	1.38235	3.19949	5.38487	6.79021
		-1.15437	1.58859	2.77923	1.63132	3.53714	2.70894	3.21221	3.60378	4.85885	8.09401	7.48665	5.45111
		0.389045	0.772166	-1.76538	-0.701318	-1.72768	0.205833	2.77439	3.15583	1.29605	4.99417	5.15702	-0.160509
		6.69691	2.01434	1.05199	0.84598	2.22348	2.63606	2.1353	3.21791	4.95038	5.80084	2.93212	3.64037
		1.56936	-2.07333	-1.43178	1.17476	-0.90234	-1.07501	1.90811	1.79353	-1.42866	1.20291	4.42495	-0.857545
		-4.51083	0.335256	0.619484	0.21989	0.675169	3.65902	-1.30954	-0.778342	1.52992	0.000660039	2.51816	1.63896
		1.01378	2.20063	2.81234	3.90585	-0.992721	-0.0132878	4.22014	0.985289	0.338172	0.467549	-2.23919	2.15911
		-1.23058	2.51086	4.36138	0.877968	4.76483	0.318099	-1.80247	-1.04197	0.60146	1.36446	-2.03508	2.22779
		-0.156792	-0.223486	-2.80953	-0.022618	1.62282	-1.85952	0.310259	2.23178	0.58983	0.486694	3.32945	1.39862
		1.94775	2.44213	0.0301534	-1.10345	0.0254766	-0.981628	1.6691	-0.542542	1.49985	-0.333659	-1.4744	-0.505248
Mean		0.576768	0.785202	0.222344	0.963477	1.10472	0.645394	1.27758	0.780023	1.2938	2.21684	2.16248	1.65051
Standard deviation		2.41889	1.79242	2.45479	2.29329	2.05746	2.07794	2.43135	1.87509	2.4381	2.80852	3.20015	2.3929
SEM		0.604722	0.448105	0.613698	0.573323	0.514366	0.519485	0.607836	0.468773	0.609526	0.702131	0.800038	0.598226
