# Supplementary material for: Contextual effects in sensorimotor adaptation adhere to associative learning rules
Source: eLife. 2022 Oct 5;11:e75801. doi: 10.7554/eLife.75801 (PMC9635873; doi:10.7554/eLife.75801)
Supplement: Figure 6—source data 1. [file elife-75801-fig6-data1.xlsx]

## Sheet: Figure 6B
Experiment 2: Differential Timing- Delay- time course
		Acquisition
		0	-11.6499	1.64277	-1.11472	-7.48558	-6.05406	3.38162	0.555542	7.62924	3.82284	-3.26687	0.572522	5.04801	7.67558	12.0979	6.80136	6.92465	19.1541	4.34505	15.1625	17.8539	20.5889	16.2334	15.0934	11.8805	14.7075	8.6855	9.11417	17.1438	16.4604	18.4936	23.8535	14.8975	23.084	15.7255	19.1307	14.9836	18.624	20.6811	11.9025	16.0122	20.5609	22.4087	17.048	24.8623	23.7751	25.9063	19.9595
		0	14.0538	5.76203	11.9213	12.221	NaN	12.8623	4.07997	14.5181	4.03908	2.09244	4.64579	10.9774	19.5104	15.1019	2.80141	6.81002	13.2889	5.90169	15.7538	9.94879	16.1687	21.0132	23.476	26.009	23.7078	23.7955	30.8322	23.7021	17.7494	24.9048	21.445	18.5296	32.7298	20.5958	18.9935	22.2041	21.0569	35.7032	22.146	15.4433	12.4398	29.0463	25.8929	33.0523	43.3014	18.1413	8.65642
		0	1.71813	-4.5403	-1.68683	6.7885	1.81456	-12.4488	-5.28447	6.78285	2.78692	2.53511	9.81845	0.841175	-1.09163	4.75594	13.4669	-4.03147	-5.32979	-9.08051	17.0877	21.8009	6.02932	-0.811456	12.4732	13.7046	0.212554	7.35882	7.11907	2.87992	6.78672	-5.4546	18.7452	18.8328	10.4444	17.1355	14.9891	3.30473	3.59862	7.39685	16.5268	19.0233	8.52022	17.9761	11.7524	11.4349	-4.40109	13.5569	8.84115
		0	-12.5352	-8.52598	-7.48267	-10.2818	-22.7935	-12.2084	-7.21737	3.52952	13.2501	NaN	0.644929	13.673	7.02563	5.19848	5.23184	-1.13937	1.61419	5.31627	19.8622	22.2164	-2.2359	0.430105	4.74456	4.30749	1.10143	7.91476	7.39169	1.13928	10.0699	5.72154	18.2309	8.44744	3.47773	2.32732	3.94213	8.15024	6.58583	6.40688	12.0615	23.0132	6.37618	3.64729	-0.657215	4.08683	6.30745	4.42945	13.754
		0	-3.39164	3.83819	12.0979	7.34973	13.0604	5.8296	0.025962	7.92283	-0.919822	13.6249	13.6741	12.758	12.3547	6.94379	0.217319	7.17802	8.43448	6.63818	5.84356	20.4417	18.9711	13.7789	1.9571	14.1502	10.9925	10.8934	9.07355	17.3328	16.2004	5.01355	1.3201	6.03574	14.5018	12.3928	-0.0157854	-6.58045	-5.0482	-2.08711	10.2282	2.23496	1.42789	11.6853	8.06258	12.2982	8.38365	5.9308	3.18372
		0	-6.2671	-0.656222	-1.44012	0.552335	2.28249	5.9858	6.84482	13.8036	17.4305	16.2387	20.9291	10.7102	11.826	11.2418	6.79784	5.27703	17.8636	11.8887	19.2746	18.6758	14.2048	15.4348	19.2876	13.8862	19.1494	16.8019	1.67004	17.1178	13.1503	22.6509	11.6938	29.7587	18.1536	17.2675	27.5341	22.3459	18.6518	16.7003	19.365	28.7019	25.3679	15.0618	16.1771	6.13207	12.5706	8.55116	7.96437
		0	11.9994	17.9528	12.9404	22.9062	17.8583	21.5323	29.6074	26.5724	25.577	32.8192	25.0186	14.719	27.8252	26.0571	26.3619	28.7308	37.6026	27.7548	26.3115	38.0273	34.0486	37.6859	27.5298	27.2636	25.8878	31.4942	31.2496	21.285	29.8694	37.2892	29.9382	29.9691	22.3755	30.3107	40.7471	36.0146	31.7535	38.2951	42.8764	31.2976	33.3444	40.0937	42.4392	39.4171	44.9253	37.3914	36.7418
		0	-2.35574	0.741993	5.07032	10.285	11.9667	2.84886	12.3442	6.15161	8.41021	-1.56272	6.43463	9.63722	3.74422	7.17664	9.49722	15.7089	6.8136	11.7816	0.997811	6.10677	5.3746	9.72855	9.87588	3.60678	19.0799	17.0078	20.6029	21.6846	5.99703	12.347	NaN	16.9444	13.3006	16.1431	22.9992	23.547	22.0219	23.0607	19.2358	25.6123	19.9008	24.231	9.97293	17.6519	15.7226	20.5053	22.6828
		0	12.2483	11.8868	11.1371	18.4353	25.7193	18.0454	6.94996	11.975	13.7157	15.5896	11.9925	8.28162	16.4218	12.3033	8.43749	14.5647	15.4585	15.9614	8.75896	16.5394	10.4041	11.1749	11.1401	15.7558	14.9928	17.0739	16.4674	13.1259	16.8452	15.4341	15.6204	22.4596	20.1717	17.8301	22.6378	16.6959	19.8032	18.7789	20.4707	18.5135	25.2998	16.8386	15.0133	7.86655	13.4083	12.6933	12.2195
		0	8.24816	9.30866	7.66491	7.519	13.4967	14.6349	11.3213	10.5309	3.55727	9.70072	9.94481	18.0394	20.3534	16.2202	23.3425	23.3267	13.6271	9.46149	6.08327	22.3783	20.6288	25.8712	26.4854	22.9472	24.028	19.8345	18.4671	20.7326	19.018	31.1904	22.8775	20.3618	24.053	17.5134	15.1997	28.4196	26.8002	24.2921	17.6153	25.4377	29.6816	28.2484	24.417	26.5888	28.3169	25.7025	23.1081
		0	8.70476	10.6812	11.8494	7.28618	2.6025	6.77712	4.10326	5.16127	9.99574	9.14318	5.91164	11.3579	6.3867	4.89431	5.46882	16.0565	11.481	13.3534	22.8079	7.71076	11.162	10.7385	18.0432	14.819	19.8983	17.6992	13.0906	15.966	20.3458	25.1731	19.0295	14.443	12.1459	21.1397	23.3054	12.0427	30.1819	27.1421	18.7719	20.3004	20.783	28.3758	18.0133	18.4969	23.3802	23.4017	21.2548
		0	7.615	8.33398	14.0388	17.3653	28.7036	11.9002	25.5992	25.1324	NaN	17.7706	15.1079	9.59505	22.3516	14.4994	32.1342	27.2786	18.4193	22.3626	28.7798	30.9549	29.6249	NaN	20.4584	23.823	28.0455	24.4612	22.0759	17.5931	25.1118	25.766	23.2653	15.7919	20.7809	10.5103	17.2927	25.6152	12.5755	19.5773	23.4711	14.0738	19.7114	39.056	37.2855	20.82	-12.4139	-1.39383	0.898087
		0	-1.81773	1.65403	-3.17823	8.52787	12.1278	-3.70932	5.37163	18.6182	6.58915	14.6091	11.5619	22.1894	1.65796	11.5799	2.3251	NaN	2.98815	13.976	22.7188	0.160084	15.7365	16.2959	0.468095	12.2489	5.47727	15.9256	18.5476	8.77652	9.65502	11.2674	3.42453	5.89177	9.50872	2.62	-7.34574	3.46184	4.8295	8.62827	6.99676	-3.33427	-3.6252	-2.04756	4.60073	19.092	22.2614	19.5438	23.8853
		0	8.6939	10.2867	13.1337	10.1615	18.8975	16.8016	19.9775	20.1497	16.4383	26.2768	26.8725	15.7422	22.3042	26.5204	14.0112	12.1295	19.3292	19.5176	13.7167	14.9052	20.1837	25.5517	22.4565	20.9781	19.2287	17.6364	22.5263	22.3934	23.893	33.3993	15.5564	19.8319	18.6974	28.468	21.2616	24.3443	24.033	21.7413	23.4848	26.7744	27.2365	24.3415	25.0793	28.6772	21.8912	23.7035	30.0127
		0	6.99797	12.0878	1.15722	-1.65589	4.92792	15.445	7.26763	0.212407	3.81779	5.92702	8.20767	17.7965	18.0754	6.33527	0.993079	10.8828	8.3905	13.2917	2.95479	16.1414	20.3356	19.1105	13.9197	9.14361	14.6837	11.972	5.06573	6.08426	6.68037	6.38615	2.45838	5.79079	3.29103	-0.315348	3.00805	4.64704	6.0969	1.24023	15.0795	16.4156	17.4793	9.375	-0.23916	3.36286	11.7674	9.05028	14.7889
		0	-0.0883108	3.76415	4.58657	1.65145	5.68643	8.94989	13.4288	10.6567	10.3094	9.77155	8.85034	4.65707	-2.6171	-12.6884	2.48299	14.0998	11.9523	5.90751	-0.544044	9.39273	9.39237	-7.18373	2.29392	10.3014	3.78919	-4.15667	-3.47192	0.101135	4.98206	0.694651	3.01384	-2.82335	-1.78072	-3.4422	5.15745	7.2531	-2.13887	6.94403	7.91019	-5.69049	16.4311	7.17101	5.06627	6.71602	3.79044	9.46531	-0.570373
		0	-20.6086	-12.9628	-10.5127	-9.97314	-3.35208	-8.47468	-10.806	3.56136	3.63179	11.4025	9.94953	6.83892	4.31846	13.5857	2.69514	0.430794	8.25282	5.96801	12.068	14.967	16.8552	15.5555	17.6832	-0.398533	18.0301	18.2383	13.389	15.4536	15.3153	21.3049	22.3861	17.8463	9.47779	19.4728	11.8753	10.6791	10.7211	17.7835	16.1747	16.1813	15.5279	17.0396	19.8794	17.3419	16.0002	18.9353	24.151
		0	1.0983	-6.58448	-0.544372	11.7963	12.0195	9.27699	13.6854	12.6436	5.61033	14.012	13.0673	15.8258	17.786	15.8937	13.0652	15.258	15.2427	13.4115	12.9887	18.121	7.56416	10.2644	6.04305	19.4616	9.06566	16.767	19.7974	15.2717	13.0562	18.3588	23.7545	9.30803	11.6737	22.932	16.234	4.59	15.8018	23.7798	21.1458	21.0404	18.4169	23.3058	22.4826	16.815	17.0072	18.3748	17.4603
		0	-0.109619	-2.02475	7.01805	18.2395	14.3599	18.0641	2.43153	1.14773	7.30011	16.3605	15.9212	18.2948	12.5497	13.2437	12.6338	27.3306	27.5026	24.2833	14.4431	18.9143	9.67253	12.9799	12.3228	17.117	19.2952	26.201	17.5984	27.6119	18.9108	22.2086	22.5858	26.7464	33.341	22.9047	30.3212	24.2443	27.8202	18.7929	26.3298	29.5731	27	39.9042	30.4055	39.1903	28.3449	28.983	14.9452
		0	0.585856	0.209505	9.67377	9.8678	4.28456	9.41162	15.4371	13.3368	13.4496	6.52416	22.3431	18.437	15.5907	10.1953	10.1822	15.5818	11.2528	-1.0895	-8.74602	-13.6753	14.1421	-3.52283	1.39986	-1.18152	3.8066	11.2644	12.0692	11.6521	15.0483	8.99363	-12.7344	-3.17509	-1.26866	-6.37246	5.08853	5.89216	7.85023	1.27031	-1.02716	-3.41434	5.35428	15.1353	1.63742	-5.24353	2.02843	4.75924	7.78222
		0	2.32043	8.26655	10.8385	15.338	9.48074	13.8753	12.4698	15.398	19.3415	17.7587	18.6426	22.0277	21.215	24.3562	24.2505	20.6065	27.9331	25.5455	25.3607	28.2743	25.5974	30.782	25.3502	20.0324	19.6747	24.3596	24.1495	25.4075	21.7215	17.9086	22.393	23.9827	22.2642	23.0573	18.3479	16.9112	29.2398	22.3994	22.352	22.5736	18.6865	18.4696	21.7361	19.6662	24.5925	22.0777	24.5912
		0	-3.47336	1.05483	5.09906	6.85919	0.647767	14.8177	8.50431	10.5171	12.2007	10.0109	-0.808	17.3829	11.4316	6.75188	19.3432	23.4478	12.9841	13.9257	27.8679	18.3531	11.5306	23.076	13.0436	15.7655	13.0611	14.831	22.8223	28.0706	25.498	18.1013	19.7357	30.3076	15.7176	27.5797	30.8113	39.3942	32.6589	25.5008	24.4217	20.0367	23.2017	NaN	34.3034	31.0883	22.9225	18.1568	13.5431
		0	12.3926	2.56572	7.98866	8.94421	14.9764	11.4782	5.40003	-2.50771	-1.93593	3.06648	-6.04474	1.56948	0.922427	1.69643	7.45872	0.101421	2.21303	-1.17377	1.56621	-1.1215	1.43521	4.58524	7.56065	4.04175	-1.89828	3.14564	7.93395	1.31735	7.45634	3.28775	6.48247	9.14731	7.74427	5.34069	-1.48082	-1.33291	-6.41685	-5.85115	-9.31877	-21.3534	-9.03759	-16.8497	-12.0665	-9.24869	-6.89583	1.47948	-0.685102
		0	8.9164	13.2981	11.6255	28.0601	35.259	38.0683	23.712	29.2928	29.9748	38.7636	47.8152	40.0826	42.1674	37.0508	34.1786	33.6875	43.4116	39.7047	30.4297	25.9675	37.9092	32.66	30.7502	34.2796	48.0654	37.9031	37.424	37.4207	33.755	35.4769	35.5801	25.4896	26.1906	22.5983	32.8244	31.5301	31.6261	27.0698	35.2722	33.5661	41.437	43.5718	44.5092	37.8145	38.9475	26.7186	35.7818
		0	NaN	NaN	NaN	NaN	NaN	NaN	NaN	NaN	NaN	NaN	NaN	NaN	NaN	NaN	NaN	NaN	NaN	NaN	NaN	NaN	NaN	NaN	NaN	NaN	NaN	NaN	NaN	NaN	NaN	NaN	NaN	NaN	NaN	NaN	NaN	NaN	NaN	NaN	NaN	NaN	28.8018	31.1903	37.0964	31.3994	31.5805	24.1531	35.1937
		0	6.86076	-0.77102	0.874329	6.83105	-0.576319	-5.55681	3.92663	17.9019	14.3175	17.6546	20.8323	23.3944	17.1144	34.4918	29.0691	23.6963	9.2477	19.2424	28.7325	28.9591	26.7402	37.1064	19.2663	58.7937	50.9884	38.0892	44.5093	51.3819	50.191	49.3052	52.8542	58.5903	55.2484	54.1159	51.7423	50.1957	50.9237	62.3147	55.0083	58.5012	61.7255	61.7164	61.7209	57.7127	48.4484	64.2562	55.7664
		0	10.7193	16.5355	-0.984758	-11.8274	1.3626	5.44955	-7.04828	5.48768	7.5044	7.73379	1.41135	-3.01309	4.46643	2.86094	2.81475	4.92308	0.482095	11.0018	13.8221	5.10287	3.82393	1.52396	-3.16933	-7.48094	-9.5377	23.9704	12.9404	15.0086	23.8803	22.581	23.767	22.7261	25.9049	27.6742	17.9982	16.4788	18.022	22.0785	6.10336	11.6418	21.1595	25.9403	26.6924	28.0158	28.1006	17.1959	33.655
		0	9.95344	1.28822	7.58945	11.2091	2.75671	8.88564	10.0805	8.47966	5.14988	8.53371	16.0995	4.19617	8.86228	7.11198	3.97254	11.2684	12.0247	16.2165	14.9115	5.22226	17.5491	10.2699	17.3757	20.1839	14.8361	33.9111	21.021	21.4582	16.1977	15.3896	15.5167	22.9667	22.7941	12.5822	18.3085	15.9927	19.6359	19.6104	14.7177	17.0708	19.405	28.9744	20.1085	22.2948	11.4221	20.366	13.6186
		0	-2.83583	-1.83237	-1.30151	-1.27578	-3.45734	7.06153	8.36384	5.96905	5.4815	5.18507	14.775	9.88604	14.9368	20.4337	10.8091	12.5502	9.85104	14.1838	11.3179	15.5283	20.8644	16.8238	26.8697	19.4237	11.9876	17.3942	21.2392	15.7591	19.4253	17.9066	14.0351	12.7434	13.3853	17.1793	14.1972	19.1046	14.838	17.97	20.7481	20.3471	20.7987	21.2401	28.7836	20.8617	22.0678	17.3318	22.1846
		0	-4.80164	-2.08958	-7.92146	-9.31044	-8.31576	-11.3415	-5.68616	-3.0974	-1.80769	-0.671034	6.73697	12.1313	13.7842	12.1607	10.368	8.3257	5.9267	11.2237	11.0543	10.0451	12.8745	8.1797	15.8145	14.0881	10.4131	13.7387	10.064	9.84459	4.23863	13.163	10.8187	6.13688	9.89037	12.9088	18.6296	5.33558	13.8864	-0.743982	9.57438	10.3529	5.48821	13.2617	7.42324	5.39219	2.79544	-0.653229	5.29487
		0	4.1218	4.32884	-1.86673	-1.23095	-0.230217	0.587864	-0.839404	1.72087	5.28538	4.35335	1.69446	-1.45182	10.6192	6.05952	10.4914	9.61102	8.17246	11.0186	15.5525	8.87754	11.339	11.2141	13.5421	14.0524	11.2617	12.5135	17.0253	13.9127	15.7077	16.6318	18.2726	14.8638	15.1912	19.3545	18.1416	24.408	21.2348	18.4887	23.5913	27.0567	24.7362	23.8703	24.6773	25.9117	22.7128	30.3934	23.6412
		0	-2.03296	-4.91668	2.2049	5.31531	1.40852	-7.39819	-8.37544	-10.4933	-1.14789	2.48765	0.538622	-7.3991	-14.0681	-5.40534	-6.4044	-0.517508	2.75003	3.93232	-0.594645	3.49664	-4.20539	-1.20061	-2.57467	-2.39306	-3.04794	-2.46657	0.790705	-1.97723	1.44439	8.76157	13.9277	1.39517	5.45231	-3.69889	2.17375	2.4854	3.81438	12.0474	12.7686	-3.96494	8.16301	1.94712	1.19593	-3.31994	10.202	9.61632	8.41102
		0	-2.1316	16.7774	11.25	6.46399	12.2162	22.9541	34.2833	22.9701	16.4128	1.77386	10.6711	7.62933	10.6686	17.356	15.3507	12.0303	19.2327	15.6671	12.1254	18.7163	19.5754	26.9676	14.5369	20.8992	13.1193	24.7931	22.0983	18.595	22.2726	9.01262	34.7471	41.775	NaN	38.8587	27.2193	22.5073	18.291	24.2093	17.3939	17.6957	19.8308	24.4195	18.3712	28.2608	26.3048	16.5728	14.9894
		0	-3.2454	0.794481	3.97121	-4.82251	-3.39374	7.82644	7.98649	7.91966	1.39277	10.1222	5.13506	4.65682	5.56082	6.95221	-4.38674	19.7528	4.05507	3.86759	2.44179	11.1436	6.65803	8.68818	5.59408	11.5999	19.9674	24.9413	18.7273	15.5266	7.65902	25.1616	23.3759	23.5186	18.3047	18.0887	7.64152	15.4659	9.41836	17.5449	18.4715	8.24922	10.0445	9.97745	13.6452	33.0512	14.4891	28.0016	22.2689
		0	8.67055	11.6365	9.00375	6.87073	5.86377	14.5273	5.90625	12.9706	11.6701	17.5841	11.3866	13.5536	20.75	16.6862	12.0256	17.9042	29.7558	34.0993	41.7072	41.8458	7.4488	20.439	38.7893	37.7167	37.5305	41.1114	23.1226	27.9993	34.4013	40.6206	35.7333	35.518	31.5286	33.7456	30.6024	38.2427	38.3295	35.5157	37.9968	39.7219	41.6005	41.9593	39.1991	37.1594	40.2092	37.9841	39.2225
		0	1.24526	-5.97231	2.1684	1.33237	-2.4096	-4.62444	-1.34043	10.6252	7.35632	15.4449	16.5423	13.499	7.17855	7.04344	6.878	4.06885	13.6832	17.2399	11.2286	16.2335	12.8686	4.43826	13.4213	8.78302	7.43281	15.0836	16.6274	15.0314	11.3375	17.1821	7.96412	14.323	1.90156	11.6646	20.7543	14.0865	8.06237	12.9603	12.7376	14.5199	2.24239	7.24442	15.8233	11.0595	3.97218	8.12423	12.0057
		0	-1.09325	3.1868	7.62163	4.99841	7.69053	11.1114	9.49787	-0.0317726	3.45342	22.3055	19.9815	21.1204	16.8761	16.9357	15.8823	20.8959	6.27138	5.35346	15.012	20.9195	19.0615	19.8852	16.6268	13.9419	21.9427	15.1511	21.6365	24.9905	8.87379	16.9453	27.8368	20.6167	20.1006	18.0249	27.0969	22.2963	36.408	23.4006	26.8112	33.7456	22.425	8.38246	17.9542	11.7333	15.2885	27.6809	37.7996
		0	9.1787	7.27671	15.2911	13.9812	7.17299	22.05	10.1351	15.2959	33.6466	30.84	14.1572	8.12355	17.6068	18.9288	13.7149	16.4613	21.5484	23.1995	5.52586	26.2981	16.426	15.7201	18.4303	5.10969	26.8666	27.3314	28.2685	22.494	18.7224	10.7776	14.144	29.2626	14.9491	16.7649	12.1157	27.6049	11.4395	17.6523	22.0581	16.6887	11.0624	21.2481	16.0305	12.141	7.34078	13.2135	2.09479
		0	6.79962	13.4661	14.1094	15.2566	27.2286	26.71	4.23632	4.31101	8.0769	14.3442	11.9013	19.8042	25.1121	20.3371	15.4308	20.1003	16.2324	13.9879	23.7006	16.1502	29.4286	18.6534	14.9275	21.3133	33.2722	22.6661	22.0415	26.5535	28.0494	30.4183	24.089	36.0709	26.7183	23.814	33.2836	29.6046	32.4548	28.7102	25.0571	21.5333	23.9638	15.2081	11.8741	19.5393	16.9895	15.8474	25.8616
		0	6.27435	16.9424	5.52928	-4.12393	28.085	9.70912	12.4756	12.6306	7.11963	15.8633	22.9177	14.3558	14.7026	15.0314	29.4876	29.2689	25.8558	24.2587	25.5988	38.874	49.7883	28.2083	35.9566	34.3417	26.9106	23.7027	41.4512	20.7451	28.8554	28.8706	14.3046	36.7239	24.3411	28.5588	30.7675	33.1999	38.1319	31.4315	34.8507	32.9195	26.7016	19.5527	30.6693	25.8182	11.6646	19.5595	34.729
		0	-6.63251	-10.1098	-5.32514	-9.75291	2.67371	-6.03269	5.08913	0.808443	-2.87012	-11.3955	6.54535	4.12904	3.78239	6.71623	2.58783	7.05342	-0.288999	6.36752	-1.12855	6.10845	-0.0356944	2.80639	5.19629	15.6169	3.88442	13.698	4.80555	7.65696	4.57464	4.19385	7.21764	7.09457	9.63379	-21.5138	-7.00943	-20.196	9.67713	0.0848454	5.3776	10.804	4.55908	6.05367	2.06249	3.99755	11.9149	3.54672	6.66559
		0	-1.83383	-4.56847	-9.09758	-2.4689	0.106674	5.71291	-1.812	-6.99111	-3.33694	-11.6646	-10.5066	-8.04513	6.85848	8.14746	-4.48368	-2.45927	4.45192	-4.49853	0.442998	-2.19814	2.87569	-0.247974	-4.55182	0.434544	-18.8225	-6.44997	6.32819	-0.473605	-0.0703203	-18.614	-17.4953	-3.91266	-8.89814	3.15765	-16.1426	-8.51849	-17.8687	-21.2393	-5.83917	3.13335	-3.26044	-20.5193	-20.5619	-15.242	-12.2918	5.1447	-17.9892
		0	8.32194	8.93026	11.6788	2.76048	27.4825	13.4545	10.2181	13.9097	22.241	7.38083	16.9725	13.196	2.64449	1.25108	4.19362	17.5976	8.93887	1.79321	0.0828472	1.68958	12.6027	18.4815	14.4133	11.2753	-2.26133	-0.603373	6.83923	0.274639	10.9643	13.3196	15.4923	17.0436	12.2392	18.8848	14.7068	13.2867	17.5223	16.8925	18.6153	23.6786	15.1951	10.5187	16.3575	17.8026	14.9594	8.8611	5.17795
		0	6.97467	5.42076	10.9814	-2.15521	1.56652	7.45682	4.05432	15.8968	15.6616	31.1063	17.747	15.5143	18.4003	17.4738	8.88061	12.5793	5.9542	12.9608	13.6968	19.2621	14.0709	15.3666	9.05745	16.8309	19.2758	21.9786	18.6958	19.2907	19.5182	27.2068	19.4028	25.2586	12.8627	17.5516	21.2759	16.5229	10.3998	24.6723	15.5105	20.7759	19.177	22.306	20.4816	18.4534	23.5703	18.669	27.068
		0	12.6838	15.4673	25.9429	19.1736	25.1244	35.5755	29.7761	38.5381	39.4033	43.5696	49.7516	42.0826	41.6635	50.5771	47.0839	47.6388	52.8213	45.7421	42.4969	49.1128	44.7488	54.3682	48.8421	45.7743	51.9336	44.7055	30.0582	38.3471	51.837	55.6199	47.7696	42.6729	49.741	46.9385	60.112	53.1458	53.6017	64.8038	52.071	50.5484	55.4812	62.2426	43.7099	59.7213	50.7802	49.7835	51.7244
		0	-7.90517	-4.6051	-0.345695	8.72644	6.24629	7.81049	9.96845	12.974	3.84642	13.4541	12.1755	1.30995	12.9202	16.2757	15.4092	10.2581	0.999005	8.81316	3.43092	8.98363	9.8813	11.4124	10.3402	11.3486	10.3778	7.25151	10.7378	4.98644	7.43674	14.6222	10.5268	-7.26664	4.97903	4.1913	15.4392	2.87184	16.1344	6.5443	7.61184	5.02434	4.6277	9.73708	6.62102	7.66408	3.01901	11.675	10.5987
		0	-4.8038	-1.38894	-3.62288	-8.81357	-3.13698	11.7411	-4.68887	-5.84633	5.83533	-2.0927	8.37173	7.60034	-2.53353	0.698398	-5.81816	-8.60256	-10.0053	-6.42324	-9.90875	-9.35291	-12.0837	-4.70472	-2.4894	-3.47862	-3.70597	-2.39089	-0.718388	-6.60082	-9.88468	-1.48838	-13.3017	-6.06988	-13.3424	-7.8013	-16.3099	-3.81053	-8.97643	-17.2137	-2.648	1.19185	1.30783	12.8135	1.19458	-9.7718	7.88243	2.54001	6.99285
		0	-5.78995	-6.86613	-11.8264	-10.8906	-4.07286	-3.82481	2.18595	-6.84948	1.73942	-5.56288	-2.23739	1.4331	7.69883	-8.49375	-15.313	-18.3652	-18.7678	-5.79833	-7.12307	-11.8891	-7.50182	-10.2759	-13.4652	1.74562	4.88129	3.88954	3.41991	-7.2627	-5.69373	0.583155	-8.91121	-3.40089	-3.15384	-4.10779	-3.90521	4.59233	1.76549	3.61943	-3.8774	-3.43797	8.40715	2.36949	3.42076	8.4929	8.59089	12.0981	4.99979
		0	3.92573	11.7883	-10.7192	5.11085	6.89839	0.689384	11.2309	8.20985	9.70303	7.9498	12.2747	10.8579	6.0355	12.7573	9.89003	8.56652	12.6736	8.20574	14.131	14.0613	12.7134	12.8857	15.9654	24.3941	15.4828	20.73	21.037	17.4996	18.1585	18.8966	20.3299	18.3673	19.4882	18.2643	21.7927	19.4637	19.7227	16.8861	19.6893	21.9593	19.499	18.1378	20.3875	16.8165	19.2658	16.7387	18.5957
		0	8.05628	1.40845	0.267669	5.4182	-10.4889	1.67301	12.1909	11.0965	7.93877	12.871	24.2977	6.00722	3.69208	7.81916	19.6265	16.2789	10.8607	14.6363	16.7135	14.2909	21.7781	33.2194	37.794	28.1498	21.757	25.9841	17.271	21.4231	18.8628	16.6179	19.8297	17.504	12.1537	17.3485	16.7306	22.817	10.2385	14.889	15.7276	23.1247	17.1822	20.469	14.9906	24.0356	18.1288	18.9988	24.0512
		0	0.0845967	9.72062	19.23	26.2249	26.0797	26.2253	20.8284	29.5228	36.6369	40.0867	49.3017	48.6098	33.4085	31.3709	31.8224	33.9329	45.3616	33.7808	34.6688	33.0074	31.287	29.1427	24.7829	24.4006	36.2	34.2702	42.6091	40.9324	35.7048	46.3569	36.8476	43.337	46.0045	35.8544	47.2347	48.1537	48.1818	46.631	55.2929	48.3342	45.604	46.743	51.452	53.7195	NaN	NaN	NaN
		0	14.7771	-7.35436	11.4059	-7.79657	-1.76656	-3.73134	8.2013	11.2895	24.8605	-1.66832	6.16037	18.8976	22.7559	18.1839	18.722	13.486	19.3303	19.0672	22.5782	6.37011	13.3474	8.57291	16.1204	19.152	11.2941	17.9632	15.3148	18.2469	28.2211	23.3661	18.054	13.2877	19.6645	18.0045	17.9529	27.3888	17.1613	10.0867	13.5457	21.0917	14.0782	20.7314	3.99317	9.21293	16.5471	5.14807	14.2555
		0	-1.53845	1.84462	3.11177	-6.34968	5.85729	2.6565	1.27524	1.35131	-2.98973	4.08743	14.6519	14.3053	14.4997	7.60009	8.43356	11.2467	10.8652	13.8656	10.3836	13.435	7.19858	12.6841	20.5255	10.5461	11.349	14.0303	21.9074	11.5445	8.84812	10.0837	12.5963	14.3409	14.4258	12.6829	21.5253	22.1543	21.1127	22.1471	20.9018	32.8831	11.5184	30.6974	28.2976	19.3508	23.1107	27.6863	28.0888
		0	6.94634	7.61189	4.32638	13.2328	18.6609	21.8541	26.3454	24.0545	22.2487	19.8573	18.5184	25.0973	27.0737	21.832	30.6732	19.9299	28.9871	27.8826	35.7781	38.7956	23.8105	29.3148	21.5491	27.9592	21.4949	30.1826	29.8765	28.9278	22.8945	26.2509	29.6025	26.9664	21.5742	22.0483	18.9543	27.0069	35.7257	39.6287	35.7887	27.4345	27.1735	35.6486	36.4355	30.3082	29.4887	26.5606	23.3443
		0	2.55524	10.2994	17.6873	10.3549	21.4234	15.672	11.4394	22.6836	25.4684	24.0988	24.3509	25.7953	23.5454	28.7929	31.5394	27.4389	27.0914	24.6738	26.1636	18.396	25.7258	26.1585	21.6159	30.0478	40.2421	28.3515	37.6433	36.0083	28.2583	31.4214	28.8713	29.7279	27.5756	24.7276	29.8978	37.4279	30.8458	32.4217	30.8231	41.7414	46.3743	38.2917	35.7794	24.3937	37.3041	29.0909	30.5228
		0	-7.37381	1.75987	8.1185	17.6773	16.6207	10.6137	8.23575	1.14159	8.72586	6.95488	18.0623	7.77278	20.6726	22.7481	21.3162	17.3645	21.2749	15.0931	12.1815	5.80367	11.1665	12.5531	14.3045	18.3952	18.551	16.5075	18.518	17.3813	9.8769	11.6843	7.5437	4.00624	4.95199	14.5534	24.805	17.7492	22.9353	23.1659	32.0386	20.654	19.484	23.0825	23.029	14.0498	17.0239	21.6907	16.4105
		0	20.0471	23.1855	26.4229	29.3561	23.3401	18.9913	27.1977	37.387	32.0062	37.331	31.0111	32.4922	35.521	37.5323	11.7039	19.0209	17.5424	27.7166	36.9763	37.2437	13.6812	23.1776	41.4353	41.8469	39.5991	31.5766	39.7921	31.8284	36.0833	49.3516	42.1742	38.2302	58.0092	26.7729	40.5899	39.932	29.5922	37.9578	39.6945	20.0135	23.3676	NaN	NaN	35.5582	52.1301	28.3644	24.9045
		0	6.27667	-1.22904	1.81479	-5.1917	3.81316	-0.472426	6.54378	8.64619	1.07751	11.1439	7.65973	6.47216	9.68078	19.2007	23.1222	23.263	18.0838	13.7986	25.4017	11.4989	29.2052	25.4542	15.7108	14.0846	9.46374	15.6	27.6081	12.4066	24.7609	21.3862	33.7552	23.4503	36.8414	31.0076	33.0004	39.4578	28.8208	29.9543	29.5128	23.028	30.9797	30.2114	39.6545	NaN	39.2799	32.1813	28.4807
		0	11.1788	10.5306	-1.31607	11.0522	19.2282	23.5295	16.4613	15.3149	18.0573	15.9215	14.9539	26.4071	19.5774	28.3426	26.5785	32.0369	24.0566	19.0242	13.0883	16.0742	21.1782	15.1429	16.138	33.5111	14.7557	15.0275	27.0866	29.0419	19.4118	21.2553	27.6547	26.8717	13.8354	26.5449	13.4724	22.815	28.5367	15.9799	27.3402	25.6284	15.9633	15.6001	31.646	16.1382	16.3986	11.3146	2.61364
		0	1.19648	0.409193	0.167821	7.56656	14.9305	10.8268	19.9393	15.8482	12.6348	24.4408	6.68577	11.9885	19.4945	21.295	18.1361	19.0288	17.6769	9.56884	14.415	12.7492	1.44509	9.53306	12.3862	11.4449	4.79407	17.6451	6.09069	3.97006	16.5456	17.7363	11.6626	20.5987	17.8776	14.7173	15.8649	17.6836	21.7413	8.60842	21.432	19.5601	16.2114	21.5679	23.6949	24.9157	20.8604	18.1528	22.8873
		0	6.65621	-1.7592	-9.57982	-11.8102	-14.9632	-10.2547	-7.16392	-1.90077	-12.4806	-2.76458	-2.11197	3.94291	10.7269	5.84915	-1.40287	-2.09548	-5.15772	-7.18041	-4.38509	1.7346	-0.340149	-4.47138	-1.05271	7.83146	0.211833	1.22482	-2.64346	-1.29747	-2.24536	4.69325	-8.90419	-7.95131	-3.29934	-3.45162	-3.7315	1.82854	8.94569	-1.93111	-1.61563	4.86554	6.7903	6.51746	6.81379	1.98185	3.09301	9.12457	2.25908
		0	-28.8696	-22.9839	-26.8194	-40.0572	-27.6815	-19.296	-19.0666	-40.1601	-33.4787	-30.2055	-18.4373	-24.6087	-21.9026	-23.3081	-19.0533	-15.6699	-13.3097	-20.4254	-20.9065	-15.2616	-10.3427	-19.5547	-14.4014	-15.6009	-10.9201	-15.6852	-21.6202	-21.298	-16.7342	-27.6417	-6.3134	-22.0625	-16.7867	-16.2248	-14.6185	-9.57627	-7.11335	-12.9384	-14.4406	-16.6736	-24.9827	0.6555	-4.34038	-14.2542	-15.4681	-8.77088	-8.26627
		0	-8.06061	5.49529	2.81385	9.55469	0.901524	2.05979	-6.24063	-5.71802	-9.65674	-1.49837	-1.07687	-2.77344	-0.76602	NaN	3.94672	5.0887	17.6424	4.52543	9.75659	3.73385	7.85322	7.03	12.1468	17.4652	7.7999	16.2944	11.8304	7.2048	13.0736	15.3152	18.7267	9.3513	17.8121	14.2775	7.10312	12.936	19.5301	13.0381	14.6878	11.5077	22.3145	16.6903	12.6425	4.89899	19.4207	15.0341	24.4888
		0	23.9372	17.5975	9.78943	NaN	9.05811	7.40418	11.8936	10.3135	4.12807	20.4713	23.0765	22.3743	29.7201	29.0179	22.1917	30.5902	31.499	26.9688	24.3556	25.2556	39.5152	37.0847	31.7768	31.0546	24.8045	33.8059	30.0844	25.9556	40.1931	27.5162	48.6405	31.4086	36.7732	36.7079	35.6548	20.7424	42.5741	44.1464	39.571	38.4805	28.1945	37.6961	38.9568	37.1056	42.9151	41.3694	49.8806
Mean		0	2.40936	3.73487	4.35758	4.86046	7.43994	8.11797	7.83357	9.47487	9.35008	11.558	12.7627	12.3465	13.3195	13.7044	12.0551	13.803	13.7072	12.9144	14.079	15.0694	14.9103	14.7336	14.9747	16.6436	15.563	17.6925	17.6054	16.2314	16.9116	18.2282	17.8035	17.7921	16.8831	16.5795	17.7449	18.1149	18.8004	18.5281	19.4951	18.9439	18.6706	20.6529	19.5364	18.7994	18.5309	18.2652	18.5626
Standard deviation		0	8.97967	8.58663	9.31953	11.7619	12.4917	11.5636	10.6602	12.119	12.108	13.2137	12.3329	11.8067	11.5793	12.2356	12.3299	12.1065	13.1368	11.9007	12.8424	13.2426	12.394	13.2475	12.3347	12.925	14.2999	11.8927	12.3503	12.7478	12.7044	14.6829	14.5765	14.5827	14.6115	13.8989	15.4039	14.8868	14.5949	16.1215	14.2699	14.8147	14.4316	15.3663	15.5893	15.7051	15.0965	12.4812	14.1082
SEM		0	1.13133	1.08181	1.17415	1.49376	1.58644	1.45688	1.34305	1.52685	1.53772	1.67814	1.5538	1.4875	1.45885	1.55392	1.55342	1.53753	1.65508	1.49934	1.618	1.66841	1.5615	1.68243	1.55403	1.6284	1.80162	1.49834	1.556	1.60607	1.6006	1.84987	1.85122	1.83724	1.85566	1.7511	1.94072	1.87557	1.83879	2.03112	1.79783	1.86648	1.80395	1.95152	1.96406	1.97865	1.90198	1.57248	1.77746
[truncated: 752 more columns]
