# Supplementary material for: Contextual effects in sensorimotor adaptation adhere to associative learning rules
Source: eLife. 2022 Oct 5;11:e75801. doi: 10.7554/eLife.75801 (PMC9635873; doi:10.7554/eLife.75801)
Supplement: Figure 6—source data 2. [file elife-75801-fig6-data2.xlsx]

## Sheet: Figure 6C
Experiment 2: Differential Timing- Delay- Acquisition
	Trial n-1	CS+		CS-			Pavlovian effect
	Trial n	CS+	CS-	CS+	CS-		CS+ - CS-
		1.00862	0.817889	0.463472	-0.547547		0.600877
		2.29148	2.40618	-1.57303	-2.77584		0.544054
		2.22855	-0.721307	-1.07044	0.450382		0.714515
		0.76312	0.907416	-0.293047	0.539623		-0.488483
		-2.06483	-0.637359	0.804578	0.113503		-0.368199
		1.94456	-2.09427	2.42993	-0.718567		3.59367
		0.154979	0.390174	0.089041	-0.493927		0.173886
		0.794071	1.89768	-0.142015	-2.27374		0.514058
		0.810277	0.292614	-0.226515	-0.543885		0.417517
		0.39846	2.17237	-1.24003	-1.45402		-0.779959
		0.239541	0.683453	-0.766932	-0.25991		-0.475467
		1.5644	0.999125	-1.34231	-1.29924		0.261103
		1.85045	0.597395	-1.06526	-1.44594		0.816865
		0.32323	-0.494324	0.193327	-0.308603		0.659742
		-2.09029	-0.595935	0.00332921	1.78737		-1.6392
		1.17449	-0.108198	-0.701622	-1.12224		0.851657
		0.724456	0.359515	-0.405847	-1.1867		0.572895
		1.44133	0.763536	-1.09993	-1.11644		0.347156
		1.71867	1.29651	-0.482694	-1.27038		0.604926
		1.2	0.834058	-1.76524	-0.0893939		-0.654953
		0.227508	2.48143	-1.18705	-3.1398		-0.150586
		1.24058	0.185828	-1.07473	-0.719624		0.349822
		3.52521	0.480232	-0.690898	0.301079		1.0265
		-1.7434	-1.14922	-0.583206	2.61493		-1.89616
		0.427265	-0.809908	-0.768989	-0.998963		0.733573
		1.76884	3.0071	-1.55309	-1.51516		-0.638091
		2.13556	3.18108	-1.35067	-0.223998		-1.0861
		0.215538	0.566309	0.124647	-0.785272		0.279574
		0.961098	1.04961	0.19275	-1.94057		1.0224
		0.305426	0.467567	-0.883105	-0.144297		-0.450474
		0.57256	3.18436	-3.53861	-0.878367		-2.63602
		-0.356563	0.232354	0.359901	-0.729797		0.250391
		1.07375	0.682769	1.27091	-2.42585		2.04388
		1.2745	-0.526845	0.169568	-0.273602		1.12226
		-0.264633	3.04232	-1.8104	0.0596803		-2.58852
		1.03571	0.0560698	-0.112477	-1.19183		1.0295
		1.37656	0.408178	1.02951	-1.7981		1.898
		1.99437	1.14548	-1.92068	-1.07199		9.72283e-05
		2.08276	1.46137	-2.33519	-1.50632		-0.103744
		2.41541	1.33038	-1.47576	-2.17145		0.890368
		0.308352	0.151131	-1.05213	-0.598691		-0.14811
		1.66671	-1.49741	0.0207845	0.883043		1.15093
		0.49729	0.223329	-1.32726	-0.441058		-0.306121
		1.79353	0.43936	-0.310528	-1.40784		1.22574
		-0.524856	1.41584	-2.21104	-2.52669		-0.812524
		1.71392	-2.00831	3.28534	-3.47074		5.23915
		1.33543	0.663007	0.698496	-1.83835		1.60463
		1.1298	1.34899	-0.330075	-1.00308		0.226908
		0.160938	1.07676	-0.300782	-0.687939		-0.26433
		0.597259	0.867759	-0.120795	-2.27709		0.942898
		0.169709	-0.454881	0.406221	-0.553734		0.792273
		0.147859	0.0568813	-0.295083	0.103231		-0.153668
		1.23618	3.30898	-2.37388	-0.912832		-1.76692
		1.67066	2.59867	-2.8255	-1.63951		-1.057
		0.528421	-1.32871	-0.794179	0.751158		0.155898
		1.89628	-0.934919	0.638714	-3.3261		3.39801
		0.149745	-0.0873539	0.318124	-0.237192		0.396207
		1.80596	1.12796	-1.48647	-1.43533		0.313427
		3.73544	3.09704	-3.352	-3.39314		0.339767
		-0.407164	1.33394	0.12642	-1.2516		-0.181541
		2.0755	1.61125	-0.94698	-2.58959		1.05343
		1.97907	0.770497	-1.41035	-1.71539		0.75681
		1.1936	-0.287553	0.277225	-1.3173		1.53784
		-0.244739	12.1868	-10.3447	-1.29326		-10.7415
Mean		0.958727	0.873782	-0.750613	-1.01147		0.172899
Standard deviation		1.09867	1.91198	1.69787	1.15924		1.88335
SEM		0.137334	0.238997	0.212233	0.144905		0.235419
