# Supplementary material for: Contextual effects in sensorimotor adaptation adhere to associative learning rules
Source: eLife. 2022 Oct 5;11:e75801. doi: 10.7554/eLife.75801 (PMC9635873; doi:10.7554/eLife.75801)
Supplement: Figure 6—source data 3. [file elife-75801-fig6-data3.xlsx]

## Sheet: Figure 6D
Experiment 2: Differential Timing- Delay- Probe
	Trial n-1	CS+		CS-			Pavlovian effect
	Trial n	CS+	CS-	CS+	CS-		CS+ - CS-
		0.119191	-2.44545	1.2196	-0.581857		2.18305
		0.473243	-1.57519	-1.79531	0.708306		-0.227588
		0.764006	0.64614	-0.493585	-0.272987		-0.0513661
		1.72391	1.33778	-0.675777	-0.287863		-0.000894629
		0.982631	-1.91663	-2.77663	-0.364693		0.243666
		-0.906366	-0.648631	3.79556	-0.753131		2.14548
		0.178176	-1.34205	0.415349	-0.338909		1.13724
		-0.194807	-0.859472	1.97176	-0.914163		1.77529
		0.350083	0.0714376	-0.512312	0.0110896		-0.122378
		0.229598	0.465497	-2.72922	1.59456		-2.27984
		-0.362377	-2.75012	1.3579	0.475617		1.63501
		0.31849	1.11153	1.99213	-2.80476		2.00192
		-0.775696	-3.2336	3.49001	0.0739505		2.93698
		0.430402	-2.02696	-0.0339693	1.01285		0.705273
		0.442634	3.40898	-2.65004	-0.878994		-2.3687
		-0.49072	-2.42253	2.96673	0.169304		2.36462
		-1.0458	2.23457	1.80577	-2.76445		0.644927
		-0.182841	-1.43465	1.49936	-0.0807803		1.41598
		0.462272	1.06173	0.0311975	-0.541191		-0.013534
		0.109122	0.278697	-1.01155	0.211254		-0.696192
		-0.388329	0.131587	0.940819	-0.198563		0.309733
		-0.00502579	1.14333	1.11391	0.552787		-0.293617
		0.389726	0.610016	-1.67255	0.0563734		-0.974605
		-0.148073	0.81926	-0.173175	-0.164713		-0.487898
		0.685698	0.323198	0.920298	-1.5157		1.39925
		0.10027	-2.67941	0.889485	0.629189		1.51999
		-1.86181	-1.80124	-0.0369424	3.98061		-2.03906
		0.284517	0.91227	-1.0479	-0.280754		-0.69745
		-0.242693	-0.426182	1.70303	0.0970658		0.894726
		-0.898875	-0.449122	-0.142025	-0.955737		0.181979
		-2.97787	4.85972	0.180911	0.790515		-4.2236
		0.522833	-3.39812	2.23683	1.45487		2.35145
		0.394306	1.83647	-0.649743	-1.98871		-0.0515985
		0.199697	-0.00868019	-0.156629	-0.14878		0.100264
		0.213229	-0.445429	-1.06875	-2.18621		0.888059
		-0.769315	0.294711	0.483239	-0.648001		0.0336072
		1.71514	-1.11336	0.12816	1.59887		0.678895
		1.10786	-1.50692	-0.815059	-0.487836		1.14378
		0.0327403	2.46118	-3.06349	-0.65303		-2.41945
		0.129548	-1.18924	2.94806	-0.105389		2.18612
		0.862581	-1.00353	0.809181	0.0465211		1.31438
		0.378919	-0.19859	0.779509	0.198732		0.579143
		-0.889145	1.18914	-1.95798	1.64771		-2.84199
		-0.270925	-1.00954	3.37849	-1.82682		2.97196
		-1.00989	0.243596	1.10775	-0.738103		0.296181
		-1.82263	-4.91891	0.80901	-1.70014		2.80272
		0.555829	-0.0682654	-1.82351	0.890404		-1.04491
		0.310325	-0.631359	-0.457567	0.741515		-0.128699
		-0.523003	1.08775	0.0197012	-0.784238		-0.403409
		0.197221	0.498867	-0.359595	-1.89538		0.61707
		-0.325295	-0.0141043	-1.17355	0.545819		-1.01528
		-1.42202	-1.09801	0.905872	0.441155		0.0703525
		-0.816837	2.98857	-3.74633	3.02907		-5.2904
		0.0396688	-0.545621	-0.536308	-0.0310075		0.0399943
		-0.443304	-0.77072	-2.66371	0.426001		-1.38115
		-1.50472	-1.60606	0.445334	-0.924392		0.735534
		-0.551618	0.818217	0.101207	-1.12254		-0.073044
		1.27167	-1.47531	2.02943	-2.68686		3.73163
		-0.433259	-1.81772	3.72979	-0.861592		2.98792
		0.0415161	-0.305605	-0.342169	0.282351		-0.1387
		-0.539573	-0.205993	-0.179029	1.11961		-0.816108
		-0.683593	0.838886	0.876189	0.0601541		-0.353222
		0.282147	-5.43478	5.17785	-0.787702		5.84124
		-1.09257	5.13061	-3.60426	-0.641124		-4.59316
Mean		-0.113747	-0.280834	0.217355	-0.172982		0.278712
Standard deviation		0.829972	1.91705	1.85798	1.21908		1.9136
SEM		0.103747	0.239632	0.232247	0.152385		0.239199
