# Supplementary material for: Contextual effects in sensorimotor adaptation adhere to associative learning rules
Source: eLife. 2022 Oct 5;11:e75801. doi: 10.7554/eLife.75801 (PMC9635873; doi:10.7554/eLife.75801)
Supplement: Figure 7—source data 1. [file elife-75801-fig7-data1.xlsx]

## Sheet: Figure 7B
Experiment 3: Differential Timing- Control- time course
		Acquisition
		0	-6.58882	-3.30188	-3.57857	-5.25507	-1.96575	3.19196	8.06389	9.60781	0.898013	-1.63482	4.22473	1.6035	2.78494	9.43192	-1.64301	2.36673	3.69076	2.07542	4.74924	2.50603	5.32569	6.27382	3.64581	7.55731	2.86571	5.0062	2.26297	1.81009	4.28174	1.18556	5.86327	5.58888	4.53686	5.49668	3.86395	1.77662	-0.263524	0.510101	0.826727	2.46805	0.482774	8.60386	5.98962	8.42716	3.92394	-0.250462	3.1308
		0	7.32536	2.62838	16.3599	8.56211	9.27525	16.3931	12.4423	16.5171	10.9457	10.2357	12.5219	9.88668	18.7591	16.8808	13.0179	14.9368	16.8656	15.5127	16.5439	10.0482	17.1804	16.8742	15.9399	6.09004	6.76182	17.3802	19.5058	19.5612	18.0823	19.6809	20.9353	24.2794	20.0387	21.7915	16.6864	18.196	13.8666	21.0124	16.9074	23.4023	15.1769	20.42	19.8983	21.9127	23.3124	16.6641	23.2383
		0	10.1358	1.2679	5.29435	0.653615	7.61448	7.37418	4.34417	11.0621	14.2903	11.0212	6.90653	2.96315	13.5124	13.699	17.8202	14.2516	12.2564	23.8688	15.0906	14.2977	16.9267	17.0128	21.9858	21.6783	20.5139	20.7711	14.5395	12.8537	17.9	17.4867	10.9175	14.0918	14.4041	15.2151	16.0694	15.6181	17.6924	16.9403	21.3229	24.6178	18.6497	15.7	14.3218	5.87613	5.92031	10.8478	19.0647
		0	12.6637	8.5184	11.4401	16.3448	15.7444	17.3885	19.7193	16.112	15.8921	27.0152	25.3833	24.3422	29.5565	23.1473	25.5117	25.0454	29.8649	34.1899	25.4304	23.7291	32.1834	30.4472	31.5468	35.1034	33.7775	32.2488	37.119	34.2353	33.1026	36.2256	32.1681	33.5752	36.064	34.1633	34.9045	36.8579	34.8338	29.1908	33.5765	35.5956	32.6322	26.7482	36.2792	31.226	40.1666	36.6372	35.5754
		0	-7.06093	NaN	-5.09384	9.06989	0.62361	2.97738	3.11106	7.22658	19.8548	8.34692	NaN	NaN	NaN	NaN	NaN	NaN	NaN	NaN	NaN	NaN	NaN	NaN	NaN	NaN	NaN	NaN	NaN	NaN	NaN	NaN	NaN	NaN	NaN	-4.65115	3.11113	-10.7828	-5.04996	-1.56595	-6.38147	-2.18198	-9.38105	-2.72304	-1.49484	1.68684	1.00278	4.22664	2.62956
		0	-2.40896	-0.421659	15.5209	11.9646	21.8506	3.70037	-0.927768	11.5202	9.21493	11.9835	10.2822	9.17058	22.1652	15.5414	16.8363	15.0593	12.6439	6.32009	10.889	15.881	21.6002	12.9272	12.3156	17.6169	20.4363	19.3582	17.2737	11.4554	19.3168	11.7193	9.647	24.8217	15.8557	13.2983	17.63	17.5857	22.6333	22.7636	17.4626	22.7737	22.3515	11.6283	11.4368	18.0673	11.1411	12.7429	17.7271
		0	3.58154	4.95426	4.12069	11.3515	16.9704	22.2798	23.2147	10.263	11.3557	21.5313	16.4182	18.9414	19.2165	8.49222	11.5821	3.79508	16.3298	9.10911	20.5144	17.3362	14.9186	16.7326	23.7819	10.2519	8.9199	14.737	15.3041	15.3012	20.6186	14.549	15.5998	8.42054	1.51352	7.4293	13.7059	17.6715	13.9198	5.68611	9.84911	7.20145	24.4127	16.1979	7.01435	13.3197	6.25442	15.9796	7.33898
		0	-1.20849	1.80446	0.400545	2.9504	10.2008	24.3455	16.9043	14.913	19.2827	20.6677	2.87303	21.8568	14.3205	18.53	21.3751	16.2895	27.4758	21.1347	17.5785	14.1799	22.0479	20.6392	19.9105	20.5829	18.9839	-3.15172	0.231202	1.00808	NaN	NaN	23.2258	24.4319	26.5948	15.8238	13.2989	-4.70281	23.6561	25.2934	3.68486	13.8224	2.95352	19.1712	13.2381	6.292	6.59657	32.8415	17.5253
		0	NaN	NaN	17.8464	14.4508	21.1423	26.5559	25.4144	21.7282	30.4769	30.7744	35.8441	30.3365	39.4735	37.2115	28.367	38.9588	32.9184	39.8775	32.3466	45.4608	35.8455	34.3523	49.0004	51.0754	52.2843	48.4825	36.1129	48.6274	54.1987	39.5167	45.3149	45.736	45.7317	45.3519	54.1364	43.136	46.8086	53.6616	53.3458	50.5073	49.8483	38.9689	41.6927	46.1824	44.6713	36.4439	36.1893
		0	-1.1214	-12.9021	-13.419	-6.51205	-8.52905	-4.67209	-4.79008	-3.1223	-6.17217	0.899719	-5.64784	2.2735	-6.18105	6.20685	3.6469	7.10873	2.8995	NaN	0.294035	-4.24416	-5.22802	0.621445	5.81332	5.74082	8.13679	12.9375	-2.78032	6.49401	3.52137	12.1227	6.5336	6.97882	13.1093	10.8139	12.4751	5.97906	20.4091	21.6044	18.6599	27.2803	23.9969	23.5453	20.4685	22.5297	6.55118	23.9302	NaN
		0	-11.181	-4.73702	-1.16655	5.5656	1.52118	2.88412	2.50835	10.5851	12.5836	16.2406	1.50556	2.8901	9.49102	-2.5972	3.7598	6.71291	-1.88724	4.57488	9.4097	9.58655	12.8084	9.34996	11.645	16.0665	10.2462	15.5936	14.8828	18.2976	11.7938	12.7516	12.351	14.6805	19.2723	18.6009	15.3258	16.43	20.2432	27.8383	27.1582	15.6398	24.5161	24.0734	21.1084	23.7872	23.6039	25.6782	18.8736
		0	-3.76686	-0.679112	1.12114	3.49759	6.51235	5.76462	16.4015	11.2191	11.0644	4.06872	12.898	15.1332	17.9433	15.968	13.9078	9.18672	19.1199	20.516	9.96646	11.7351	14.2551	14.6331	10.2713	13.629	23.1033	11.2256	9.65551	14.2637	17.989	14.4853	1.88318	7.45148	0.0427347	12.4014	13.1953	1.29452	13.6978	24.0065	16.8603	25.1487	18.3533	21.5477	4.50753	16.3346	16.4897	8.46465	10.8254
		0	-12.4154	-4.71769	0.292112	-3.89494	14.8893	-3.64124	8.26847	9.48766	19.3166	4.98643	23.4833	6.07753	11.2267	11.7753	-2.36117	7.51522	1.95456	7.05041	5.70328	2.83284	2.30904	7.81783	6.53785	4.20065	11.4208	4.51856	5.23067	3.24285	10.4805	17.0965	12.349	15.5834	7.27979	12.4657	15.1896	15.6705	11.0206	12.3685	9.93789	10.9064	22.5962	9.2828	11.0787	14.6119	12.1889	17.4537	17.5656
		0	NaN	NaN	4.25835	5.99027	1.75164	-6.08351	-5.55218	9.62728	8.98205	9.88786	12.8507	10.0104	0.109006	5.25645	8.61344	6.95634	3.62579	11.0323	5.57919	1.05043	7.56109	6.68431	4.73845	3.90872	6.88729	6.97482	15.2858	15.7656	8.32006	6.41743	5.53995	16.9392	15.8136	4.75637	18.5599	16.1817	20.1502	10.1714	11.3706	18.7008	9.96521	22.159	17.0785	14.6626	19.6764	20.9912	20.9332
		0	-0.232649	3.01699	-2.24614	-1.91528	-1.88062	1.37264	-0.375859	0.978547	5.22699	0.244894	2.98057	10.6487	9.66434	-3.54147	3.19548	-2.98687	0.869857	3.6682	-3.33708	-2.67096	-3.11025	-7.18857	-5.87095	-0.364007	0.968682	4.92822	-0.000571576	4.09648	-0.130533	0.567797	2.51142	2.21235	0.339672	-7.11001	0.503053	-0.718057	-2.41975	0.956269	-1.35985	-1.13455	-1.8312	1.199	-0.47682	0.80944	1.65317	6.11515	0.414641
		0	7.03772	-2.74184	1.8419	-2.92206	5.07325	7.27471	11.5549	3.07203	4.9858	1.84668	2.86578	2.67703	0.648673	2.34489	2.38438	-0.882518	2.08093	0.237972	-5.76602	0.0801413	-2.0169	0.176032	1.78147	-1.70756	-3.21348	3.20083	9.68315	-5.15301	-2.31319	3.78837	11.1808	10.4679	4.24192	-14.7954	3.00253	-1.78238	0.215898	11.1292	6.35871	-1.56352	9.58934	10.6653	13.6895	-2.25869	4.19557	5.20723	16.2506
		0	10.2797	12.7939	8.12988	10.2192	13.0206	-0.59602	23.7867	14.4931	11.2648	15.3451	13.7106	21.4781	15.4879	26.0838	13.3528	9.09501	16.5769	12.195	13.5573	14.5901	20.0652	15.4569	20.1015	22.3951	24.7914	10.5762	11.6309	12.1559	14.3214	22.458	22.1036	25.5208	27.2572	23.0193	26.4044	24.6397	18.1045	14.1897	23.022	24.1607	17.9487	30.9956	16.8858	15.9435	16.3665	17.3193	28.085
		0	-2.69895	4.92128	4.83409	14.9537	17.0004	8.75362	13.0991	3.69045	4.90235	0.617243	9.1615	9.95543	0.137744	15.0088	-0.0451608	8.65859	16.6732	12.8783	13.3678	13.113	8.09428	10.9917	7.41097	10.92	7.71778	8.405	13.1317	-5.12768	13.2806	10.3884	6.57386	7.1174	3.73549	5.69563	11.4795	3.75664	6.05177	4.08398	1.76716	9.38865	8.95884	13.4993	8.0768	8.57552	-4.59289	-4.66562	6.94783
		0	5.65825	11.0915	10.7588	3.19594	12.5132	6.85442	9.79166	16.9514	22.6716	26.1341	23.9495	25.5594	30.1986	22.843	17.4538	22.272	17.6938	18.6355	22.8266	21.8089	17.9474	21.6709	11.6104	13.8731	24.5829	8.4679	31.802	30.044	26.5742	27.6526	22.0136	18.5994	30.7692	23.5567	26.3945	14.2749	20.9742	20.8192	30.0737	19.0837	22.3332	23.8407	22.792	27.3807	19.031	25.3895	20.3629
		0	1.15347	1.72962	7.95131	11.5911	10.0543	11.8781	14.9885	20.7839	28.7493	18.1199	22.5359	20.5923	18.0567	21.8092	19.7173	21.9208	25.88	22.6557	23.7507	25.7898	11.1872	25.9351	10.012	22.2324	21.787	23.0604	18.1312	28.0368	37.6285	19.1995	18.9422	17.0882	20.2108	22.2542	31.0279	22.1288	29.1347	21.2054	32.503	14.213	22.3592	20.7809	26.4704	15.1019	15.6543	21.0148	20.6064
		0	-0.351256	4.90903	3.56413	-14.6189	5.75159	0.0224048	8.07235	5.78267	13.6862	-6.19881	0.853798	4.75705	8.11084	10.6891	1.19561	4.76581	8.24635	23.1916	16.0084	1.34499	5.33618	-2.80787	9.1953	2.29661	4.26686	9.04983	10.2425	1.93219	-1.02287	-2.2819	-1.76282	4.92459	-8.60045	2.13071	0.547406	-1.14998	5.27942	-0.485864	12.7968	13.6961	6.87545	7.27936	8.45678	5.84285	7.52394	6.34732	13.9981
		0	-3.68359	-0.216757	-2.8849	1.79019	-4.24344	8.62409	17.8383	7.82434	4.66911	8.4816	10.3967	3.85121	6.3352	7.95903	10.3865	18.7382	2.65639	5.283	7.72554	15.7306	3.69727	0.814489	3.60882	-1.63906	6.48833	2.23838	8.79184	11.5311	3.81849	7.99006	12.6265	19.3769	6.68949	15.3391	6.13324	13.2241	4.51052	11.4203	18.5163	3.47945	10.961	15.7328	6.04366	13.8476	12.8555	13.6147	-4.83906
		0	14.0447	2.16574	-2.8216	9.17875	14.8056	20.9403	12.7102	7.16778	8.95096	17.769	16.5874	16.3259	21.8667	23.4406	15.2294	29.239	25.2451	15.5228	18.4352	12.4623	20.7929	25.0261	23.2842	25.7101	26.4627	28.0122	31.9173	22.8906	27.2028	34.7407	27.2641	27.3513	26.2677	29.2204	34.2831	36.762	37.9966	33.7572	38.5634	34.886	42.257	30.0493	40.5433	34.9499	31.6579	24.6253	39.155
		0	6.87024	8.8046	-6.00679	0.038585	5.6315	15.258	11.1116	3.07665	11.265	1.92731	5.5288	7.01025	7.20722	13.7555	1.46314	5.64095	11.641	14.7063	6.47168	14.6928	14.1458	12.6618	3.7459	12.8096	14.253	15.1847	25.5586	14.9305	16.1919	14.9218	15.2443	14.7131	8.55049	6.17732	15.9303	7.76318	18.7755	12.5229	13.6978	10.3276	18.9664	17.1761	23.6519	17.937	13.0656	15.0039	18.6021
		0	4.30895	-5.60765	-6.52228	-24.7051	-7.94019	-6.54274	-14.0233	13.9669	26.2481	11.2481	5.46625	4.41185	16.4955	4.3918	5.01201	17.7205	6.00763	2.8919	10.0535	17.2867	10.4997	16.4292	17.8114	26.308	9.507	12.0617	13.3658	16.7997	13.0146	6.66677	24.1095	15.1523	-3.00058	0.554633	-8.53709	20.2034	0.357616	-6.68217	7.2016	4.38541	16.8294	21.41	NaN	23.0719	18.7288	21.1165	33.7236
		0	-5.80201	-10.9196	-12.9356	-13.8706	-10.5659	-9.75617	4.47132	10.9081	1.09914	-1.84494	7.91309	5.88558	-0.7776	6.14248	2.8937	2.83197	1.33518	-0.264508	6.39909	5.41738	7.59617	9.18881	4.99369	-0.8748	2.29805	5.14967	7.70451	4.23744	6.75842	0.0631465	0.0437566	22.0381	20.7402	29.6053	25.1313	26.904	22.3484	23.8357	27.388	25.7001	23.3941	26.3522	27.1709	26.2452	25.6068	24.4294	25.9391
		0	17.7639	15.3836	17.4014	31.4213	16.8473	36.5974	32.1457	33.8229	39.7601	43.6123	38.5876	31.0043	41.0382	33.815	31.8422	41.56	41.5444	31.6974	38.2626	28.464	36.2937	32.7157	36.3677	39.846	37.8875	39.7031	39.111	30.3342	36.7226	32.837	43.9734	35.3171	33.5829	35.5796	38.5073	36.9334	34.5343	35.4303	24.0962	36.7	35.0763	29.495	33.7073	46.1518	29.6338	27.4074	35.7883
		0	-6.23946	0.514045	5.67735	3.05489	1.92158	16.3245	14.1848	7.23085	-7.07156	4.20722	6.07586	10.9501	16.1973	3.77758	1.30785	17.1367	18.6743	24.9037	38.0041	33.3625	29.691	28.6639	23.037	28.0713	17.245	27.3781	35.576	36.9968	29.3603	42.8997	42.3161	27.7003	36.8799	33.4962	31.8572	42.0934	55.4462	60.366	43.846	51.6737	46.1736	47.6472	43.1846	46.2465	44.8027	41.209	32.5672
		0	8.62364	7.93927	13.4334	11.0676	14.5894	18.2041	6.79638	3.59392	7.59534	8.79012	12.4429	15.4016	19.9768	32.6915	25.0637	20.5291	15.613	11.4454	11.2502	19.4071	16.491	15.252	21.6346	12.5277	20.2603	37.1424	29.2031	26.2883	14.3603	21.1243	23.8325	15.3574	13.441	18.5035	18.0563	24.2055	23.7193	23.0137	22.935	28.1227	25.6421	15.8189	31.2542	29.6697	27.4029	35.721	21.8577
		0	9.59963	14.3944	11.3217	9.5179	5.22765	6.53406	11.345	6.06201	5.83964	11.7615	14.7382	14.9744	23.8234	19.5254	20.8004	17.0768	16.5135	19.5358	18.4262	16.0829	20.6985	17.4942	10.6056	14.278	13.2757	9.68191	14.5705	13.904	10.3458	16.1097	16.8171	15.4538	11.9653	16.7084	19.467	23.82	26.6948	16.7089	18.5281	16.1746	10.1118	23.4336	24.1221	23.5943	25.6451	29.9364	23.0168
		0	12.0287	9.84661	6.70604	4.23792	24.1086	8.7468	6.66329	7.20159	6.35922	-9.94524	8.7163	5.60591	18.1891	5.79682	2.04778	16.9291	28.6285	12.9645	14.428	18.1127	10.3877	-0.674911	26.5668	7.04212	17.6727	10.6153	13.4142	0.66626	14.3502	23.5908	-0.413447	11.5723	27.9825	25.9303	19.9516	1.79738	13.0191	20.6971	12.4891	18.6463	14.7813	17.9254	6.97346	15.5371	10.7362	25.8624	13.0028
		0	42.0703	17.9935	29.5499	23.9533	21.6212	13.9394	8.63425	20.9231	16.5802	21.8648	19.8496	13.5822	15.9319	24.4148	25.391	35.9222	32.4102	20.3235	27.9488	20.3456	25.7759	23.8564	17.234	NaN	20.0713	24.9889	35.5845	26.0042	21.9995	31.8458	40.3826	29.042	25.0377	15.3946	NaN	22.0172	17.7525	22.1938	38.2485	22.285	9.11836	35.4712	16.6359	11.3869	20.087	35.0514	19.7357
		0	19.0444	18.7675	19.0348	16.0005	12.272	21.1431	37.4814	49.387	37.0262	35.229	44.17	45.8988	23.1188	41.9806	42.6217	46.263	64.7943	45.3745	59.8516	49.6582	59.6325	46.469	28.0333	32.167	43.7586	52.4434	50.4178	52.3658	42.925	23.627	26.0208	13.9084	20.2546	26.4555	29.6261	30.5193	29.4571	32.9861	19.4034	28.2244	23.8716	34.1314	26.8104	10.9263	14.23	14.8544	13.4621
		0	-6.23088	-1.24149	-9.95066	-6.68462	-8.86043	-1.71699	3.32744	5.24804	0.673206	2.8134	-7.41555	7.70916	10.3552	1.93012	5.6962	-1.59685	0.869624	2.24638	9.31309	3.19767	8.587	3.64506	-0.738543	6.08157	6.24538	7.57462	8.75042	2.46345	-7.3449	18.9066	13.3807	9.66889	2.28564	6.78802	10.4074	2.70854	5.00785	3.79787	0.75569	-0.448363	2.52934	0.0279233	-4.47507	-3.52772	3.42545	5.52576	6.07107
		0	-7.17982	0.513041	3.31423	0.0998306	-4.60093	-2.267	-0.138071	5.60691	1.97725	16.8018	5.93434	7.71055	13.9544	13.3867	4.69965	8.13573	13.6191	18.6188	22.1987	15.5756	4.24993	9.28482	8.08138	8.5518	10.1251	14.4195	8.5828	12.5845	6.4229	14.8813	13.7513	9.6224	18.6887	6.8734	6.22453	1.35308	8.41748	4.97285	20.3334	13.8021	12.1033	13.1707	11.1834	14.5066	9.39622	14.1795	15.0996
		0	10.0979	-4.50599	12.002	10.2419	3.29654	1.45834	3.12211	8.1543	3.3536	12.7282	19.9236	2.40427	11.927	17.9618	5.14595	12.2217	13.4263	13.7571	13.8607	22.5433	21.2549	15.4958	22.8125	15.4768	15.0596	23.4748	29.5493	18.5973	22.2302	25.8052	19.9831	19.5847	18.1304	16.0789	19.0029	22.6838	27.4953	21.5992	20.8639	26.6856	22.5341	20.1411	26.1845	29.0904	28.7499	23.3644	20.5875
		0	1.45326	-4.63544	-2.79941	0.599536	1.97178	5.38482	4.80059	-4.95368	3.82248	5.10818	2.09626	6.28039	7.22852	7.26953	-2.86273	6.29998	-1.46389	-6.81909	1.43285	7.25394	-0.714297	-7.63198	-6.18501	-1.35247	1.12905	-2.94722	2.86336	4.24621	4.55997	-1.56227	-1.06972	-7.76527	1.35389	-1.43208	0.508691	2.91085	1.42783	0.530141	-1.17205	-0.404028	-3.80116	-5.53868	-5.26347	-2.04412	2.07432	-2.77407	-2.31383
		0	-1.77095	-7.14917	3.26586	7.52772	6.43593	6.74919	9.26057	14.8833	11.0596	13.3805	26.7319	26.1855	22.601	17.746	16.3895	21.3558	21.0603	27.3163	25.2823	30.0074	18.3265	31.9736	11.717	19.1568	30.2233	27.0348	29.693	15.0626	32.5887	28.0634	42.3642	37.2351	31.871	28.1793	37.3101	21.081	39.3569	36.162	36.6261	39.576	30.6308	37.745	36.978	38.4012	33.1748	27.3262	43.6551
		0	4.17852	-6.36766	5.04915	0.183756	11.0424	8.34045	0.916041	7.38807	6.05493	18.7025	15.8487	9.25475	16.9459	9.3403	13.0345	3.74481	9.45121	10.2094	11.9513	6.91142	10.6743	7.40609	13.076	9.81647	16.3203	7.63711	14.3928	11.1114	16.9106	15.2179	8.21268	13.1462	13.3228	10.1532	17.8291	18.9659	20.099	26.1908	26.1297	28.619	27.1834	20.667	24.6104	14.0085	16.5851	23.1796	24.82
		0	12.0178	15.078	12.8451	13.2303	20.5534	24.2524	27.8667	20.5107	21.588	29.6499	10.228	14.3323	13.7984	30.3845	35.2797	36.5934	41.5482	35.6534	36.6057	44.5755	32.5973	44.4345	42.8604	40.1902	34.972	38.3974	39.764	25.0544	35.4244	38.3781	41.0705	32.7515	35.2813	19.3017	27.9533	30.0453	30.8649	36.4297	33.2786	42.0823	32.3278	24.9948	28.8584	27.3227	28.2873	36.0931	32.0542
		0	-9.11344	-8.57004	-10.43	2.34567	-6.22666	-10.6249	-4.72583	-2.63163	-7.17054	-2.74813	-1.50665	6.34298	4.27506	4.88119	-0.372817	-0.744188	-1.10742	-23.1331	-6.06447	0.0821512	4.58348	-11.1484	11.233	0.831394	13.246	5.304	-1.9667	8.96764	6.34153	3.11169	10.4488	9.98508	8.67462	5.61053	11.1869	16.6782	12.1152	15.2825	29.6155	19.579	15.7291	14.2464	23.4006	9.95039	23.943	24.0738	8.52236
		0	-6.34009	-8.9632	-10.7058	-17.6849	-14.1589	-4.84148	-10.7997	-8.08642	-15.2077	-4.05102	-3.02237	6.47318	3.56891	11.8769	-2.17961	-2.53902	0.764618	-1.871	3.06157	7.68389	-3.80434	-0.213073	-8.0634	10.7384	6.53047	-1.96058	0.320236	12.8646	8.86113	5.17986	6.90897	15.061	6.83229	-10.6478	10.4873	12.7347	13.7856	13.314	30.0005	10.6144	19.5953	19.2467	17.0125	7.67697	18.979	16.3811	21.4941
		0	2.1402	5.68454	6.66978	7.08789	7.72365	7.53047	5.67022	7.43798	9.9234	16.2516	6.28737	10.8609	9.68765	7.81119	1.81054	11.7954	9.22543	8.34441	16.6425	31.9799	13.6123	16.4256	14.7336	12.6911	23.6363	18.8866	19.5425	22.0112	19.3615	23.8208	14.3228	17.7091	30.684	27.7305	23.8153	20.4869	22.006	26.5101	21.2818	24.6836	21.4612	31.0758	22.0191	17.7698	25.7621	18.5464	30.6111
		0	9.9968	8.85753	-0.401781	6.86695	NaN	-2.18317	16.8375	16.0094	24.215	19.4759	15.058	15.9457	-1.96067	6.0261	13.3495	18.6393	NaN	0.73349	5.6742	15.3184	3.58958	18.3992	4.53516	6.15428	NaN	14.5451	2.46268	20.6501	NaN	-0.986339	13.8372	30.7787	34.396	18.2506	31.1104	40.4916	33.4269	19.238	17.4963	27.3059	NaN	NaN	NaN	13.8169	25.4556	34.3659	25.6035
		0	1.5133	-6.92887	10.9481	13.1023	17.2977	0.675144	0.0790236	7.87892	-5.55036	-1.55043	-0.639147	-3.79473	-9.70142	-2.23975	6.70054	8.98832	6.21154	0.965454	3.46438	3.12564	4.1985	-1.86013	-0.792448	2.71244	3.30734	-1.3259	5.852	-0.536865	10.3808	11.1869	2.65934	4.18169	2.90419	2.24532	8.13078	-3.32123	7.01552	5.81999	13.9508	6.74724	12.6881	8.46857	-2.64049	2.73725	6.41896	9.6968	2.27447
		0	2.09602	19.7584	14.1968	17.6591	11.5433	20.2724	18.6831	23.8724	15.2096	19.9136	14.7255	16.5927	11.2638	21.0635	23.191	19.9356	11.2252	13.5411	17.3278	19.0088	4.32854	21.0072	16.5902	10.7509	15.8845	10.2674	5.7139	15.1046	15.4234	5.64389	18.0978	14.4772	13.2223	14.1767	12.5098	17.3592	11.6439	12.2885	-1.52913	14.3523	11.9519	14.1086	17.1356	15.4647	12.1038	21.3527	21.178
		0	9.85007	10.6084	8.54549	4.02448	9.81662	2.95645	6.50638	15.2761	6.1624	14.2796	15.2035	15.246	15.6309	18.3087	15.3385	14.6041	19.3645	15.2994	7.63201	15.8996	20.1178	12.9414	21.2467	32.399	24.347	13.5549	15.3398	20.2477	13.621	18.4585	12.9271	6.43691	13.583	13.3046	5.0675	11.1928	11.7768	14.676	10.4396	21.2876	18.3913	16.8733	18.7664	18.0797	17.8447	20.316	19.4168
		0	14.3729	10.5195	5.29987	4.47554	6.93905	4.02362	10.3272	-13.8979	5.564	2.46944	-5.54247	17.7696	20.4566	1.87292	1.09686	1.87435	2.26928	6.70728	10.6011	10.9509	14.069	7.95411	15.5741	13.6006	-1.75294	10.6822	14.2724	1.3913	13.4099	-5.28171	7.71694	3.04875	11.5334	11.2429	4.70531	-3.37718	7.22953	6.88037	5.40968	7.05	2.60529	10.0784	-1.74334	-0.0128573	29.4345	10.8094	NaN
		0	-13.2457	-12.4162	-12.8809	-10.1591	-15.0303	-2.79094	-1.90626	0.325674	0.41089	6.2906	4.23031	-1.05959	-2.92567	3.01653	2.8747	6.31778	6.14559	-2.77913	-0.00504532	2.95411	-0.737713	3.78453	15.2706	16.4311	9.47987	4.43526	8.06471	9.56994	9.12102	18.0546	10.323	1.23572	8.74664	8.9371	5.77306	9.67603	10.0359	7.21405	17.5492	18.0897	13.7399	21.7797	9.17704	10.6589	17.4823	13.6661	23.2976
		0	1.42608	-4.2465	-1.10663	3.76718	11.7204	5.66947	12.5786	16.0249	11.0622	14.5157	13.4346	12.156	18.0051	16.3811	20.8964	13.2514	20.5537	15.2534	18.3454	17.522	11.6325	12.7734	24.9424	10.8038	13.7762	17.8591	20.6018	15.5043	14.7013	20.8924	34.8603	20.9046	20.4927	23.0465	24.1896	21.2429	25.6261	16.5141	24.9581	23.8824	20.9968	24.2284	30.106	24.3467	24.5782	22.4913	26.1559
		0	-11.6862	1.3243	-2.68086	-5.07285	-1.54419	-5.70058	3.657	6.20407	0.570549	-0.477526	-1.03777	1.47146	3.89638	-3.38099	-7.38391	-0.394879	-0.338085	0.530915	4.59599	0.244145	-7.28791	4.93059	5.93575	6.46175	3.35145	10.672	4.48028	2.39792	1.28602	5.04335	-0.182875	8.675	-2.90772	2.50761	2.70031	4.33812	4.31524	4.776	19.46	14.0035	4.55331	7.92633	11.2127	2.64256	-3.178	5.74793	6.88324
		0	NaN	10.2408	13.6979	19.5881	31.5049	25.9303	40.9344	33.8639	45.7583	41.4765	55.8541	44.8951	52.1495	42.3319	49.7794	46.0285	30.4191	45.0017	31.7258	NaN	46.2434	44.1799	37.0812	55.4658	47.6292	35.965	62.9801	45.2293	60.2367	49.0276	33.0781	39.8499	54.1484	56.4621	41.8345	53.2069	39.3693	37.571	53.0147	NaN	47.3814	53.789	40.5222	24.1486	18.3189	39.2135	36.7
		0	9.95547	1.49069	2.51307	5.88397	6.26737	20.8127	10.3847	10.1514	11.1337	2.81745	16.2188	15.0166	14.5693	9.39265	8.98342	16.8244	19.3257	15.499	22.6268	20.9759	15.4391	14.2657	14.644	15.1213	6.91857	18.763	11.2177	21.965	18.962	15.412	16.4559	15.1897	13.1717	11.2892	23.6629	25.0931	23.2201	9.18032	23.8867	15.9895	19.2846	29.0269	23.8763	27.3647	25.7538	33.068	29.6226
		0	11.4143	5.294	13.6872	6.76976	4.66979	11.147	3.75073	7.35113	-3.18735	16.4732	16.6863	9.55269	9.78056	4.16963	6.64332	7.81585	13.3807	7.00195	10.7302	5.78599	4.83855	7.55477	13.8336	4.73085	11.9567	15.6527	7.3753	14.048	16.1566	6.54084	13.204	10.1336	10.4373	11.2066	22.7785	21.3369	10.9184	16.9501	11.9644	5.2098	5.61184	6.18422	9.80215	1.43068	3.46838	3.64792	-2.33705
		0	2.05358	-15.9112	-17.4301	-0.864372	-12.7194	-15.3693	-13.3556	-2.62189	18.4652	5.0635	-3.16606	7.3098	-0.954112	NaN	-1.33385	4.60369	0.494786	-15.9351	-14.261	-6.4443	-8.36817	-8.20121	0.273417	-18.2207	-0.56976	-6.69503	-5.28413	-4.39233	-4.60799	-6.97874	-6.69629	-14.828	-18.5452	-12.869	-2.39115	-4.51027	-13.6006	-7.16861	-9.4481	-4.50263	-11.0905	-11.4475	-8.62843	-6.72299	-7.77575	-4.60458	0.676149
		0	22.3021	18.71	26.621	25.5093	36.5782	28.7955	40.5728	32.8547	31.2707	32.605	37.5714	39.6113	46.8518	43.3115	48.1136	43.7423	45.3566	44.5329	36.4473	38.3579	36.8889	41.3928	41.1616	45.9004	47.1464	45.0996	48.994	47.9507	48.9476	49.6572	43.6425	46.5332	43.3719	37.7167	39.8159	44.4528	51.1955	37.546	46.6186	45.3266	45.7993	46.27	47.0382	50.5703	48.0613	48.8351	46.4155
		0	4.37496	3.51507	-0.577026	-1.41513	5.2771	1.3084	12.8721	12.5705	13.013	6.79896	11.5612	12.417	20.8078	15.3542	17.0574	11.7075	11.2771	11.757	11.1086	12.2358	23.3944	16.9205	27.6645	20.3333	19.363	22.1603	26.4344	18.4113	19.1734	18.9175	22.6219	12.4822	22.1569	13.0235	18.9479	22.8643	22.7443	20.5686	22.1739	19.9801	24.0077	21.263	23.714	26.7405	26.3929	32.5444	25.462
		0	-8.0149	-6.7016	-4.65759	1.32444	-4.6567	-2.00206	-1.40481	3.5958	-5.14595	-6.06207	5.16363	0.745714	1.71372	2.06006	4.1956	5.28556	-1.46668	-1.59336	0.290503	2.94095	-3.90242	9.11603	-3.1914	4.72533	2.18	3.08772	0.973192	8.16787	7.18166	6.18203	9.86411	8.67494	2.93633	8.2349	-2.12337	6.66795	0.270698	5.47834	6.17545	9.10637	7.49715	6.0138	6.83633	8.31933	10.1016	9.43182	0.977058
		0	3.20342	-1.91579	-9.43132	11.4609	2.20612	5.58324	10.0644	-0.574629	-5.63854	2.98659	13.6426	27.0705	2.21498	13.5208	4.02221	10.242	11.1714	12.404	-6.47521	5.89181	12.1151	8.94626	12.4828	11.5035	11.4309	15.3091	17.5346	16.2825	10.219	20.6037	13.3506	20.8221	9.14342	5.37158	22.4652	7.60376	9.34535	9.13147	9.30391	14.3794	8.01937	15.4523	13.8699	15.3938	7.42284	14.0589	17.1887
		0	19.7513	14.2975	12.749	19.0686	26.8023	17.2876	24.0631	20.3041	15.1969	28.455	23.0409	27.7175	23.5375	26.49	25.3494	33.6664	37.9655	NaN	16.5255	16.3772	34.9364	24.8351	16.481	24.6532	25.7904	25.0758	23.0918	31.9922	34.6634	33.9884	35.6916	24.4401	30.2151	38.2352	34.3061	27.0757	15.9318	32.7767	30.6256	22.2535	35.0244	38.1715	NaN	22.3771	32.7111	24.3696	31.5651
		0	23.284	16.208	16.7641	27.1134	8.42082	17.2794	27.5515	7.60965	13.3819	15.4071	17.2609	22.1624	27.3705	30.6607	19.8519	23.3083	22.0444	22.1509	13.0241	23.0894	31.6444	19.607	23.5235	19.8702	16.482	28.8399	25.811	29.9405	19.1556	34.4064	25.5986	25.2625	32.5637	37.3459	24.6196	31.3368	32.6562	25.6442	27.3419	27.849	26.5046	12.4603	22.173	19.1922	29.4604	34.2999	22.9511
		0	-1.70401	8.21504	7.45084	8.35823	12.0977	7.80947	14.2448	-12.7295	-6.75628	3.70246	10.7269	8.44129	-14.7725	-8.89445	-9.2238	-5.42764	1.3321	-15.908	-9.33469	13.4154	9.0752	10.1628	6.7925	6.01138	10.8369	0.402741	10.5858	26.0301	17.2105	25.5081	5.65092	14.9466	7.29515	13.7896	16.4885	15.6796	16.1618	7.45275	12.8727	15.1474	17.1837	11.0772	10.6481	9.35691	2.31177	1.78584	6.6843
		0	10.1838	11.7142	18.6773	19.1759	16.8447	15.6822	1.0884	14.6472	17.3366	24.4462	32.8914	29.4978	20.5892	23.2724	28.0596	44.1233	18.8297	32.8804	29.8721	21.7424	27.5364	27.1899	29.296	20.5827	20.2028	16.2049	25.6719	27.4449	14.9827	21.3698	15.265	23.5786	35.5108	21.9663	13.2861	21.5711	25.3641	12.178	21.1308	15.1869	20.7442	20.9458	22.9684	26.0852	17.8368	25.7601	22.6845
		0	6.58748	3.46714	-4.44729	-3.31269	-2.57872	-11.63	-5.42782	-0.362419	-12.2524	-13.4934	3.94254	11.6677	8.07071	8.52861	8.9081	7.71616	2.45049	7.8358	10.054	10.9903	-0.228644	10.4333	5.47497	3.69662	4.64446	12.5973	3.59326	7.5483	-12.5003	6.97971	0.343501	-8.62727	-2.64135	5.32513	-12.1642	0.441189	8.11614	-9.64356	14.7091	12.3516	10.6709	2.16225	4.49032	4.873	3.99411	0.736105	-3.36347
Mean		0	4.00651	3.00234	4.17158	5.58124	7.33402	7.56021	9.85624	10.0871	10.2201	11.3979	12.6668	13.5562	13.7305	14.2953	12.1406	14.7418	14.7782	13.0051	13.7462	14.6721	14.283	14.3254	14.7086	14.7623	15.876	15.7039	17.0114	16.4089	16.6897	17.2235	16.7268	16.5189	16.4359	15.1581	17.1168	16.5371	17.9517	17.1483	19.0699	18.5733	18.1243	19.1879	17.6794	16.9671	17.0994	19.3078	18.8698
Standard deviation		0	10.1395	8.75142	10.0043	10.5317	10.9183	11.0052	11.8162	10.7207	12.2087	12.1478	12.3974	10.7305	12.554	11.8623	12.7956	13.1406	13.637	14.2545	13.0976	11.9645	13.5783	12.9453	12.1457	13.5752	12.553	12.9104	14.2108	13.184	14.2079	13.1863	13.1032	11.9653	14.2477	13.7517	13.0439	13.9908	13.671	13.689	13.4887	12.6648	13.0171	12.4929	12.9107	12.6884	12.3411	12.258	12.2481
SEM		0	1.29823	1.1205	1.25054	1.31646	1.37558	1.37565	1.47703	1.34008	1.52608	1.51847	1.56192	1.35191	1.58166	1.50652	1.6121	1.65556	1.7319	1.8251	1.65015	1.5195	1.71071	1.63096	1.53022	1.72405	1.59423	1.62656	1.79039	1.66103	1.81914	1.67467	1.65085	1.50748	1.79504	1.71896	1.64338	1.74885	1.70888	1.71113	1.68608	1.59562	1.64001	1.57395	1.65305	1.58605	1.54263	1.53225	1.55551
[truncated: 752 more columns]
