# Supplementary material for: Contextual effects in sensorimotor adaptation adhere to associative learning rules
Source: eLife. 2022 Oct 5;11:e75801. doi: 10.7554/eLife.75801 (PMC9635873; doi:10.7554/eLife.75801)
Supplement: Figure 7—source data 2. [file elife-75801-fig7-data2.xlsx]

## Sheet: Figure 7C
Experiment 3: Differential Timing- Control- Acquisition
	Trial n-1	CS+		CS-			Pavlovian effect
	Trial n	CS+	CS-	CS+	CS-		CS+ - CS-
		0.512074	0.921235	0.334169	-0.806501		0.365754
		1.91586	0.918748	-1.35184	-1.29847		0.471874
		1.88747	-0.474195	0.613261	-0.560567		1.76774
		0.511112	0.42826	-0.589379	-0.233339		-0.136594
		1.387	0.333605	-0.355249	-0.531411		0.614778
		0.253148	-0.189725	-0.279145	0.0455138		0.0591069
		0.929711	0.375117	-1.17695	-1.06584		0.221743
		0.398074	0.870133	-0.895644	-0.552154		-0.407774
		2.00442	0.477934	-0.727563	-1.26655		1.03274
		2.30011	0.0155776	-0.823488	-0.803743		1.13239
		0.487095	-1.25732	1.3092	-0.425029		1.73932
		2.28809	-0.0855881	0.12927	-1.24745		1.8752
		0.817261	1.31556	-0.871445	-1.60322		0.116736
		0.84069	0.263729	0.0743023	-0.798649		0.724956
		1.01757	-0.179613	-0.451821	-0.366348		0.555855
		0.257332	0.707063	-0.103137	-0.799418		0.123276
		1.40516	-0.546734	1.06553	-2.90403		2.96073
		2.37636	0.342493	-0.466046	-2.40933		1.98858
		1.03622	0.177109	-0.353595	-1.14048		0.823001
		1.67304	0.595378	0.958631	-1.73018		1.88323
		1.63346	1.77249	-1.53296	-0.844271		-0.413857
		0.645724	-0.049729	-1.43028	-0.383948		-0.175441
		1.07793	3.13069	-2.44598	-2.44682		-1.02595
		0.964701	1.53181	-1.03846	-0.574815		-0.515376
		0.700133	0.753594	-0.20944	-0.917379		0.327239
		0.0896436	0.611976	-0.067116	-0.323677		-0.132885
		0.406627	0.896665	0.840205	-0.757322		0.553744
		1.50113	2.28202	-0.244185	0.302492		-0.663781
		0.344743	1.71704	-0.8904	-1.11644		-0.57313
		1.98352	-1.41598	1.05315	0.030062		2.21129
		-1.19068	3.14567	-2.74363	-0.365059		-3.35746
		1.42926	2.13629	-1.70955	-2.16429		-0.126148
		1.68329	2.32926	0.0390194	-1.94137		0.667209
		0.512897	0.124152	-0.360665	-0.255867		0.141973
		-0.624408	0.905395	0.0129267	-1.64498		0.0640498
		-0.321478	-0.12555	-3.59374	0.177631		-1.98365
		-0.287516	1.10464	-0.71621	-1.41089		-0.348736
		-0.120082	-0.0891369	-4.82515	-0.313591		-2.27125
		0.410763	1.46271	-2.02404	-0.672015		-1.20199
		-0.442416	1.22254	-1.74685	-0.156888		-1.62746
		1.16379	0.682293	-0.249545	-0.631126		0.431539
		0.895544	1.34119	0.554996	-3.14972		1.62954
		0.68198	0.309392	0.929876	-1.29098		1.29672
		-0.398073	0.28795	1.77382	-0.837998		0.962899
		0.821518	-1.06142	1.24428	-0.404766		1.76599
		0.0837986	-0.247381	0.448268	-0.888355		0.833901
		1.29264	0.840945	-0.830577	-0.560016		0.0905669
		1.3297	1.28377	-2.22917	-0.870218		-0.656513
		2.84466	0.774819	-0.379142	-2.05837		1.87454
		0.641999	0.838287	0.0182545	-1.49683		0.659397
		1.3872	1.27017	-1.23566	-1.39907		0.14022
		0.413304	-1.04457	1.12464	-0.238528		1.41052
		0.475521	1.24488	-0.511589	-0.831906		-0.224521
		0.152108	-0.426752	0.73202	-1.48443		1.39766
		2.02299	2.67927	-2.95403	-1.7977		-0.906303
		1.3782	1.08206	-0.145826	-0.524172		0.337245
		0.585213	0.711009	0.652867	-0.712748		0.61991
		1.01188	1.10868	-0.810942	-0.973419		0.0328381
		1.47952	-0.223628	0.445695	-0.798894		1.47387
		1.64865	0.547749	-0.871198	-0.663385		0.446545
		0.615205	0.771133	-0.661865	-0.506203		-0.155795
		1.1128	-0.196529	-0.524213	-0.82609		0.805603
		0.00666134	-0.449304	0.335023	0.371781		0.209603
		-0.42471	0.60077	0.48998	-0.466443		-0.0345285
Mean		0.873705	0.643439	-0.47263	-0.926816		0.342226
Standard deviation		0.817812	0.957452	1.21539	0.727911		1.11307
SEM		0.102226	0.119681	0.151924	0.0909889		0.139134
