# Supplementary material for: Contextual effects in sensorimotor adaptation adhere to associative learning rules
Source: eLife. 2022 Oct 5;11:e75801. doi: 10.7554/eLife.75801 (PMC9635873; doi:10.7554/eLife.75801)
Supplement: Figure 7—source data 3. [file elife-75801-fig7-data3.xlsx]

## Sheet: Figure 7D
Experiment 3: Differential Timing- Control- Probe
	Trial n-1	CS+		CS-			Pavlovian effect
	Trial n	CS+	CS-	CS+	CS-		CS+ - CS-
		-0.135622	-0.0668447	0.778308	-0.49329		0.601411
		0.59932	-1.81276	-0.106262	-0.109909		1.20786
		0.469098	0.855118	-0.587281	-0.824391		-0.0744548
		-0.896981	-0.376742	1.43948	-0.205395		0.56232
		0.823072	-1.7792	0.24551	0.00939049		1.4192
		-2.50216	0.419147	1.90197	1.71299		-1.36616
		1.02262	-1.24419	-0.37991	0.479596		0.703653
		0.486785	-2.85181	3.2163	0.689651		2.93263
		-0.25482	1.65676	-0.312107	0.380611		-1.30215
		-1.71093	0.433647	-0.302229	-0.478754		-0.984027
		-0.908701	-0.591471	0.556701	-0.941904		0.590687
		0.753038	-0.498503	-0.576504	-0.410719		0.542878
		-0.637314	0.148256	-0.51298	0.422038		-0.860294
		0.394184	-0.198135	1.20683	-0.618414		1.20878
		0.490502	-0.90099	0.217077	-0.306757		0.957663
		-0.187439	0.264757	0.235137	-0.739184		0.261062
		1.82974	-0.587319	-1.22738	-0.195647		0.692661
		0.979767	-1.52722	0.724565	-0.548596		1.89008
		0.325878	-0.977526	1.16877	-0.578945		1.52556
		0.0338215	-0.481657	1.14609	-1.9987		1.83013
		-0.247604	0.973011	0.0506126	-1.46587		0.147933
		0.200194	-0.138667	-1.54367	-1.01128		-0.096765
		-0.410093	-2.04936	2.01872	-0.268537		1.96326
		0.188572	-0.884283	0.637497	-0.034212		0.872282
		2.26588	-3.3302	2.70805	-1.35782		4.83097
		-0.359636	-0.96469	0.88717	-0.805433		1.14883
		-0.0913138	-0.161242	-0.0715884	-0.785683		0.392011
		1.02948	-1.90311	0.437549	1.21943		1.07535
		-0.318848	0.960396	0.504639	0.266848		-0.520726
		0.249776	-1.51401	-1.11311	-3.69645		2.17356
		0.132633	0.392026	-1.61837	-0.254698		-0.811533
		-0.938378	2.04615	-0.558676	-1.53201		-1.0056
		-1.24904	0.907885	0.0497768	-1.63741		-0.23487
		-1.04819	-1.16826	1.21609	1.39685		-0.0303417
		-1.59117	-0.146072	0.478934	-0.114934		-0.425614
		1.06522	-2.17204	-0.150395	0.716322		1.18527
		0.141958	0.343893	-0.493243	-1.44147		0.373146
		1.90744	-5.2573	-1.31037	0.383381		2.73549
		1.2318	1.01819	-1.72782	-0.972207		-0.271005
		0.719216	-0.869189	-0.32337	0.577612		0.343712
		0.678461	-0.648028	-0.658854	0.15201		0.257812
		1.27465	-1.37878	-1.75743	-0.297561		0.59678
		1.23222	-2.75322	-0.98791	0.264889		1.36632
		-0.553684	1.35255	0.434811	-0.680863		-0.395279
		1.09043	1.03588	-2.00285	0.269635		-1.10897
		1.93713	-1.44339	0.435665	-1.54835		2.68227
		-0.413862	-0.77354	1.10516	-1.09187		1.27836
		-0.640177	-1.96395	2.15386	1.41772		1.02996
		0.0549152	-0.144645	0.906245	-1.66446		1.38513
		-0.213715	-0.00093088	-0.65505	-0.780232		-0.0438013
		-0.484861	-0.745039	0.635733	-0.0895914		0.492751
		-0.903108	-3.77922	2.67894	1.13253		2.21126
		0.444289	2.84246	-1.51996	-2.61301		-0.652557
		0.0283537	0.0872597	0.878456	-1.09624		0.957895
		-0.0650916	-4.07733	-1.4941	-1.20027		1.85921
		0.771077	-1.73043	1.27784	-0.22226		2.00081
		-1.72072	-1.33834	2.89794	-2.79367		2.65461
		-0.0911333	-3.17906	2.18716	0.645695		2.31469
		1.17001	-2.02077	-0.198478	0.807102		1.0926
		-0.13842	-1.21317	-0.0279817	0.602013		0.222375
		0.353984	-0.501785	0.441766	-0.169972		0.733753
		-0.655125	-0.598302	-0.335787	1.53796		-0.965286
		-0.0456322	-3.56199	2.07434	-0.134412		2.86256
		1.25752	0.0081118	-1.01347	-0.120111		0.178023
Mean		0.128426	-0.789988	0.255728	-0.363238		0.76869
Standard deviation		0.940675	1.51129	1.23545	1.04116		1.21516
SEM		0.117584	0.188911	0.154432	0.130145		0.151894
