# Supplementary material for: Contextual effects in sensorimotor adaptation adhere to associative learning rules
Source: eLife. 2022 Oct 5;11:e75801. doi: 10.7554/eLife.75801 (PMC9635873; doi:10.7554/eLife.75801)
Supplement: Figure 8—source data 1. [file elife-75801-fig8-data1.xlsx]

## Sheet: Figure 8B
Experiment 4: Compond- time course
		Acquisition
		0	13.8572	20.8692	34.3966	37.1764	36.1171	36.0313	33.1011	33.2849	34.435	35.8283	34.8737	28.4712	32.7197	32.5357	32.0502	27.505	30.0883	30.4598	21.5804	22.8531	25.9261	21.5672	24.4842	19.3752	21.3631	24.5745	25.6387	22.8489	18.2648	18.6401	19.154	13.5678	23.5014	23.1356	23.1843	23.314	22.8844	18.7215	18.4703	23.4481	22.1188	21.98	27.1086	23.5773	25.7688	28.2679	25.6871
		0	5.54268	9.21368	10.8237	15.3966	24.1674	17.728	20.5997	29.5355	28.9594	35.2334	31.5047	39.1721	36.7343	37.2313	38.2265	40.4877	40.3929	40.6692	43.363	38.8195	40.4674	34.1223	37.3669	44.0656	42.5652	34.4118	32.6096	34.1872	34.7192	39.6821	28.1534	24.864	30.3946	35.2327	35.769	31.6208	34.1362	22.9601	29.9891	30.1682	34.2876	34.9859	33.6524	32.2414	32.1816	27.1768	25.8155
		0	28.8608	32.8939	39.6108	43.6668	55.3816	56.7223	47.1488	49.6757	42.6971	33.6437	43.1401	40.8451	42.2187	38.5717	36.4456	34.8438	43.7261	29.2198	33.367	40.3628	36.4914	36.8924	23.3654	28.4921	29.792	33.4699	34.3852	34.4296	38.717	29.2413	25.4257	34.4825	22.0921	24.2456	29.3825	28.5007	32.7223	28.5063	31.5183	40.8174	21.1074	21.992	25.6575	18.8585	21.2873	24.8207	25.7689
		0	0.971872	-2.08454	7.32087	9.67586	11.4772	7.14767	15.3665	17.0702	20.4512	15.3802	32.1262	25.0048	28.4738	39.7928	13.1707	27.7919	27.6312	9.60139	19.524	22.761	14.7859	17.6617	-4.35774	16.3461	15.2692	-8.4661	0.706266	10.7706	-6.08475	-4.90896	7.96621	2.2604	-13.529	-12.2536	-9.89753	-8.63669	-13.0135	-5.6547	-2.40071	-10.3406	-7.77	-4.02197	-15.9018	-4.26511	-7.53162	-1.1433	0.52959
		0	7.49027	12.9767	16.2455	21.2244	28.1548	24.2773	26.5635	25.4307	31.7192	34.3997	35.075	35.5098	35.893	28.3655	28.7986	25.9068	36.7774	27.1749	32.0212	29.2577	34.5938	37.2625	31.4712	28.8479	27.4588	25.8003	32.7429	31.6025	26.7107	28.614	30.5321	33.7078	29.6858	27.1504	37.5948	36.9291	37.6932	24.4655	32.9855	36.6182	34.4173	28.1631	26.7697	27.5986	32.8544	35.8436	29.7786
		0	2.34389	5.96319	9.09119	18.8823	16.0813	19.4148	23.6909	17.6484	21.3995	18.0753	16.765	16.1828	13.2499	13.4588	2.24576	6.42436	8.8086	2.43524	9.92329	2.54267	1.87012	-2.15276	10.086	-2.14097	-0.268022	-1.91734	2.07049	-1.27773	-8.37525	-3.16903	-0.709546	-3.37577	-2.02179	0.275057	-2.89285	-1.59152	-1.47131	-3.8189	-6.31445	-2.24376	-0.400315	-2.90964	-0.351958	1.70914	4.22366	-4.38895	1.73631
		0	-0.540977	0.500234	10.3262	10.1573	10.3753	20.2321	16.3016	16.899	16.3097	21.2691	27.4875	14.7052	23.9576	23.1265	25.0435	24.3505	12.601	28.3415	29.2757	27.517	26.0075	29.9339	35.7784	27.641	28.7891	22.4089	33.195	37.0095	33.2149	35.7202	27.8213	33.2843	43.3852	37.0401	34.0069	31.4693	33.8676	33.3817	32.8305	28.8669	26.6587	24.6009	35.8087	36.8184	33.7841	33.1145	32.176
		0	2.92579	10.9732	-1.93506	-0.0974946	6.06862	27.8889	24.3906	14.0236	34.3311	11.517	38.9907	40.4755	47.9797	20.8461	34.5915	24.7132	32.2538	23.4794	37.9282	37.142	29.0116	21.789	37.082	49.7184	26.178	24.5462	26.3647	22.0854	30.7216	48.1339	27.7431	29.1426	34.2906	46.4426	28.8204	38.2867	32.3434	36.3685	26.0707	20.9151	22.3831	37.5691	33.8328	30.5259	47.1126	30.4049	28.0107
		0	9.86868	5.32401	2.47138	7.24314	15.308	16.3462	21.2957	18.7612	22.1687	26.1107	17.0537	21.0369	20.8538	22.6624	21.0185	25.1082	32.1102	29.4448	31.5566	31.011	37.0046	34.5453	38.6468	40.6696	23.7161	27.829	31.9576	24.2365	30.0958	26.8333	30.4506	30.7307	23.1181	20.1086	22.1625	25.6172	33.6563	34.2319	31.5417	32.6488	31.6481	29.575	31.1552	29.6444	27.2219	31.1461	33.3857
		0	11.315	14.0198	26.3919	21.2719	24.9309	36.1574	34.3416	32.9254	34.1992	36.1688	35.2079	43.5397	44.5025	15.1193	39.8257	37.3501	44.1374	25.0266	23.8236	26.7679	34.6811	36.3036	15.864	15.1755	15.8937	32.1018	34.6446	38.7944	38.8596	27.0506	48.4303	39.2549	42.3159	36.6903	43.5885	46.5427	30.4613	35.0784	21.773	41.8781	28.257	33.4574	30.0539	25.8272	30.5976	47.2324	36.4689
		0	15.095	13.3857	18.2857	17.5911	16.5503	16.7387	29.4795	22.8061	17.3767	18.0081	18.1526	19.6115	19.2498	16.2243	15.1434	10.8306	12.8592	13.3703	14.1597	15.6446	14.4474	10.2105	13.0887	13.9462	11.0032	14.8772	13.2348	10.2326	12.2069	11.5876	16.3435	13.3946	13.4352	14.2084	14.7995	11.5509	10.1533	8.13247	13.3264	16.4596	11.4919	8.83972	11.7641	3.80138	14.5037	12.2124	3.19178
		0	1.48014	8.15204	5.91171	14.0024	12.1614	17.1808	13.2782	14.7766	17.0942	13.1977	19.2935	12.2197	8.08791	19.0357	23.2863	13.4964	11.5281	15.0626	12.9332	13.5289	10.7361	17.3761	12.2237	6.24202	0.831017	7.9099	6.16643	-1.42648	3.28901	0.178511	-6.90463	-2.49218	-3.73992	-0.10136	-5.13783	-4.4092	2.85514	5.60079	0.0260404	-6.06395	-1.94624	-2.88127	4.29513	7.6487	1.8835	5.91747	2.41792
		0	1.42388	-6.96003	2.60564	-2.55414	1.80784	7.11283	4.75053	5.36404	10.6204	15.4378	16.093	13.1128	16.5542	19.655	29.4605	29.1191	24.296	26.6922	34.9298	33.4182	36.3037	29.9779	33.1219	34.8504	24.8804	36.6888	40.9387	38.6955	34.382	30.3011	19.3837	31.1737	28.9108	36.0172	32.2862	24.7614	22.8127	36.9597	40.4484	43.376	40.1159	42.3866	37.3899	45.5977	40.8889	43.9295	40.432
		0	-2.17216	-2.13188	1.02338	-7.55907	-5.4854	-6.90377	-8.50482	-4.63117	-5.34379	-6.23958	-2.19826	-0.725462	2.23431	-2.72066	2.20865	5.60634	0.652418	9.30439	7.8554	13.2039	9.84898	7.96645	9.93642	8.90675	10.2891	11.8879	12.2404	12.3796	14.5704	17.1191	9.71481	11.3095	8.60611	12.0745	8.22722	8.68915	11.1999	12.0616	8.80843	6.7162	6.70816	10.8597	2.62121	7.99916	8.00735	10.381	2.31637
		0	6.86558	5.92137	8.70918	19.2125	19.5513	20.1343	24.7572	22.5087	16.5762	18.3049	17.5693	15.8641	21.292	22.3228	26.7481	24.7718	30.2528	30.0494	30.2951	35.3419	33.2198	25.4305	26.8006	27.662	35.7264	32.4478	30.8785	26.827	30.7781	28.4334	32.477	32.2655	35.0726	33.4083	33.9513	35.9984	39.0644	43.4579	38.3752	33.7413	38.5577	46.5509	42.9597	48.4119	50.3179	40.6739	37.225
		0	1.83233	6.1633	14.8689	13.7042	17.6959	16.4039	23.4335	20.2408	24.2296	25.3774	31.1108	24.8777	28.3497	28.0544	28.321	28.4935	19.8661	30.4405	26.5856	29.1922	23.5776	24.2483	24.106	25.8508	19.6521	15.8148	21.5729	22.7203	21.2017	21.4797	21.9235	24.8939	24.6559	22.645	20.4166	21.4636	23.4439	22.7499	25.1528	25.2966	30.0335	25.49	29.1957	29.9421	24.6241	27.7152	23.3188
		0	4.76579	15.2226	15.9251	18.8931	21.0431	20.5792	18.768	19.9375	20.5376	19.7672	17.5393	14.366	19.4238	12.9531	11.4984	6.90842	1.66966	9.05042	13.9341	17.6982	11.7556	4.60878	10.2846	6.46529	3.42919	4.78911	10.1891	12.7136	13.0171	14.108	8.50701	6.81804	7.37494	7.02832	9.6268	8.11301	9.85843	3.41569	6.00994	11.9884	13.6939	11.4997	10.4482	9.58302	12.2222	11.5708	7.82304
		0	7.1058	7.59539	8.79025	9.06909	6.71538	6.02084	10.491	5.46686	2.72303	6.55251	5.22728	6.61779	8.19019	4.98086	7.07363	2.4793	4.14992	4.45024	2.39427	8.82891	4.17066	5.35983	4.78618	5.47735	4.01647	5.10336	3.31294	8.62885	7.03322	2.81709	3.47779	1.17027	-0.136935	1.48809	4.96646	3.6652	2.70527	7.56726	2.27609	5.14107	5.3387	3.54065	2.23771	2.96276	1.64652	4.89847	2.62223
		0	-6.43902	-0.730629	-2.86716	-0.223492	0.555656	-2.28564	-3.93853	-1.59737	1.23801	-5.46779	10.3036	-12.2336	-5.5044	-1.22209	-13.8436	-8.45686	-7.41181	-10.3998	0.58584	-20.4014	-5.826	-9.01973	-11.2841	-17.0719	-14.305	-7.98312	-20.858	-14.1927	-15.2218	-27.2022	-17.3648	-32.1072	-25.1039	-25.2774	-21.7896	-31.3053	-26.9001	-28.2831	-28.599	-30.2933	-26.7807	-35.6683	-20.9123	-24.7886	-22.026	-29.3948	-32.0437
		0	-1.68196	7.38902	9.72141	11.8569	8.12079	13.4124	15.859	19.5088	15.9233	16.4229	13.0535	16.429	26.9594	18.2302	19.1125	17.2447	15.8337	25.1748	17.6416	19.2777	15.7911	13.3497	15.446	19.4761	22.0594	11.763	19.2497	21.0767	15.1536	20.9152	21.8628	19.874	20.9664	20.9179	18.7371	19.779	18.6169	11.1233	20.8509	17.6531	18.238	14.79	15.209	10.0091	24.7316	15.8406	20.5958
		0	-0.831998	5.29046	11.7345	16.9026	18.0265	22.3005	28.0443	31.6453	31.1947	32.0649	37.5535	41.2494	38.3155	39.3084	38.9423	43.8995	41.903	42.1766	43.007	45.0238	44.0577	33.7627	23.8219	35.0039	35.3693	30.6328	12.821	18.9426	23.6141	32.2897	31.9565	27.2104	24.845	28.0369	29.5073	28.6962	29.2531	22.5555	25.0433	30.5013	36.8016	34.0317	38.915	39.698	27.2387	23.0817	20.6908
		0	5.45831	2.71385	6.04893	14.0372	15.0418	13.4521	17.3844	14.9411	27.132	27.3549	25.9156	27.3727	15.8462	20.0647	15.4171	16.501	20.0598	18.9083	21.1676	15.8253	18.4805	12.5543	12.1606	15.018	12.176	13.5234	18.8743	25.3344	21.065	17.669	13.397	15.2438	16.276	17.712	15.6959	16.4925	18.7031	14.6761	14.7614	15.8237	12.8406	13.4004	18.111	15.9177	20.1314	17.8979	18.3138
Mean		0	5.25168	7.84821	11.6137	14.0695	16.3567	18.4587	19.8456	19.3737	21.1805	20.3821	23.7199	21.9866	23.8901	21.2998	21.5811	21.1534	22.0084	20.9151	23.0842	22.9826	22.6092	20.1705	19.2854	20.4553	17.9948	17.8279	19.2244	19.8463	18.9969	18.8879	18.1701	17.5761	17.4725	18.4648	18.3184	17.9794	18.4112	17.4662	17.4065	18.778	18.0819	18.1014	19.0918	19.0599	20.5305	19.8727	17.5573
Standard deviation		0	7.49924	8.59895	10.6841	11.6873	12.9266	13.4241	12.3351	12.1469	11.8659	12.1569	11.9065	14.5024	13.9811	11.9743	13.9474	13.2846	15.193	12.9295	12.3121	14.6551	13.8434	13.5174	13.6219	15.8897	13.7596	13.8241	15.0661	14.0625	15.4531	17.1556	15.0241	17.1588	17.7927	17.6367	17.1562	18.3972	17.4047	17.1756	16.9929	18.9041	17.0966	19.0262	17.8112	17.8296	17.6693	17.9456	17.2258
SEM		0	1.59884	1.8333	2.27786	2.49174	2.75597	2.86203	2.62985	2.58973	2.52981	2.59185	2.53846	3.09192	2.98079	2.55294	2.9736	2.83229	3.23916	2.75658	2.62495	3.12447	2.95143	2.88192	2.9042	3.38769	2.93357	2.9473	3.21209	2.99814	3.2946	3.6576	3.20315	3.65826	3.79342	3.76015	3.65771	3.92229	3.7107	3.66186	3.6229	4.03037	3.64502	4.05641	3.79735	3.80129	3.76711	3.82601	3.67256
[truncated: 852 more columns]
