# Supplementary material for: Contextual effects in sensorimotor adaptation adhere to associative learning rules
Source: eLife. 2022 Oct 5;11:e75801. doi: 10.7554/eLife.75801 (PMC9635873; doi:10.7554/eLife.75801)
Supplement: Figure 8—source data 2. [file elife-75801-fig8-data2.xlsx]

## Sheet: Figures 8C, 8E
Experiment 4: Compond- Probe
		Comp	Tone	Light
		0.407892	-0.487279	-0.168259
		0.388072	-0.66855	0.336995
		0.243055	-1.01198	0.349013
		0.392028	0.515308	-1.31344
		-0.109512	0.753955	-0.890668
		-0.129572	-0.474499	0.555261
		0.463638	0.17586	-1.15815
		0.485946	-0.365411	-0.278308
		0.644775	-0.825367	0.208865
		-0.0941896	0.00994965	-0.329314
		0.0901199	-0.127608	-0.377339
		0.705167	0.00736204	-0.0644703
		0.515718	0.383547	-1.25684
		-0.331913	0.592779	-0.351764
		0.0473552	-0.373429	0.447172
		0.430231	-0.355309	-0.300902
		0.653647	-0.0625834	-0.6076
		0.43416	-0.171955	-0.523438
		0.528277	0.262229	0.335718
		-0.245644	-0.213223	0.257237
		-0.0545496	-0.959863	0.492761
		0.120365	-0.12416	-0.148994
Mean		0.253867	-0.160011	-0.217566
Standard deviation		0.313038	0.483792	0.57102
SEM		0.06674	0.103145	0.121742
