# Supplementary material for: Contextual effects in sensorimotor adaptation adhere to associative learning rules
Source: eLife. 2022 Oct 5;11:e75801. doi: 10.7554/eLife.75801 (PMC9635873; doi:10.7554/eLife.75801)
Supplement: Figure 8—source data 3. [file elife-75801-fig8-data3.xlsx]

## Sheet: Figure 8F
Experiment 4: Compond- Probe
	Trial n-1	Comp		Single
	Trial n	Comp	Single	Comp	Single
		-0.439471	-0.689941	0.731884	-0.106403
		0.617956	-0.0852922	0.22008	-0.190098
		-0.0139107	-0.174759	0.375682	-0.374306
		-0.0920337	-0.35939	0.662774	-0.291111
		0.33619	0.587701	-0.322077	-0.410733
		-0.17349	-0.276288	-0.11326	0.228235
		0.0358974	-0.531999	0.695039	-0.479499
		0.434055	-1.17998	0.512678	0.126289
		0.19191	0.178415	0.839856	-0.558916
		0.709967	-0.328904	-0.621051	-0.0764549
		-0.0143114	-0.0472159	0.161675	-0.355567
		0.942874	-0.115673	0.605826	0.0257113
		0.71008	-0.170145	0.413049	-0.543991
		0.666957	0.575153	-0.886842	-0.0331703
		0.45889	0.542846	-0.161785	-0.268709
		0.273868	-0.32182	0.496567	-0.3317
		-0.233873	-1.36505	1.20653	0.164867
		-0.173677	-0.806131	0.738079	-0.0935398
		0.743668	0.65472	0.367987	0.119544
		-0.102328	-0.0349213	-0.310367	0.00619639
		-0.0259011	-0.333698	0.0591421	-0.127942
		-0.168179	0.746047	0.273945	-0.606522
Mean		0.212961	-0.160742	0.270246	-0.189901
Standard deviation		0.39405	0.564687	0.509205	0.249254
SEM		0.0840118	0.120392	0.108563	0.0531411
